# Supplementary material for: Seeing virtual while acting real: Visual display and strategy effects on the time and precision of eye-hand coordination
Source: PLoS One. 2017 Aug 31;12(8):e0183789. doi: 10.1371/journal.pone.0183789 (PMC5578485; doi:10.1371/journal.pone.0183789)
Supplement: S1 Table — The column headings in thistable (excel spreadsheet) are as follows: A and H show labels for the four viewing conditions; B and I show labels for the two manipulation conditions; C and J show labels for the two session conditions; D and K show labels for the two gender conditions; E and L show the subjects' initials; F shows the times (in seconds) of the straight ahead group and G the precision (in number of pixels "off center"); M shows the times (in seconds) of the sideways group and N the precision (in number of pixels "off center"). (XLSX) [file pone.0183789.s001.xlsx]

## Sheet: Feuil1
DIRECT	NOTOOL	S1	M	AM	6.654	630	DIRECT	NOTOOL	S1	M	AAJ	3.624	577
DIRECT	NOTOOL	S1	M	AM	6.388	460	DIRECT	NOTOOL	S1	M	AAJ	4.461	617
DIRECT	NOTOOL	S1	M	AM	6.8	729	DIRECT	NOTOOL	S1	M	AAJ	3.885	625
DIRECT	NOTOOL	S1	M	AM	6.841	695	DIRECT	NOTOOL	S1	M	AAJ	4.019	625
DIRECT	NOTOOL	S1	M	AM	7.152	596	DIRECT	NOTOOL	S1	M	AAJ	4.04	766
DIRECT	NOTOOL	S1	M	AM	6.585	672	DIRECT	NOTOOL	S1	M	AAJ	3.988	918
DIRECT	NOTOOL	S1	M	AM	6.838	504	DIRECT	NOTOOL	S1	M	AAJ	3.951	446
DIRECT	NOTOOL	S1	M	AM	6.466	567	DIRECT	NOTOOL	S1	M	AAJ	3.853	519
DIRECT	NOTOOL	S1	M	AM	7.271	598	DIRECT	NOTOOL	S1	M	AAJ	3.886	236
DIRECT	NOTOOL	S1	M	AM	6.79	447	DIRECT	NOTOOL	S1	M	AAJ	4.087	559
FISHEYE	NOTOOL	S1	M	AM	9.975	1186	FISHEYE	NOTOOL	S1	M	AAJ	10.728	366
FISHEYE	NOTOOL	S1	M	AM	9.623	570	FISHEYE	NOTOOL	S1	M	AAJ	12.902	569
FISHEYE	NOTOOL	S1	M	AM	9.837	861	FISHEYE	NOTOOL	S1	M	AAJ	10.924	648
FISHEYE	NOTOOL	S1	M	AM	9.371	1127	FISHEYE	NOTOOL	S1	M	AAJ	10.826	598
FISHEYE	NOTOOL	S1	M	AM	10.05	908	FISHEYE	NOTOOL	S1	M	AAJ	10.152	397
FISHEYE	NOTOOL	S1	M	AM	9.925	759	FISHEYE	NOTOOL	S1	M	AAJ	9.409	629
FISHEYE	NOTOOL	S1	M	AM	9.786	941	FISHEYE	NOTOOL	S1	M	AAJ	10.122	471
FISHEYE	NOTOOL	S1	M	AM	10.399	1619	FISHEYE	NOTOOL	S1	M	AAJ	8.979	612
FISHEYE	NOTOOL	S1	M	AM	10.08	1633	FISHEYE	NOTOOL	S1	M	AAJ	9.413	427
FISHEYE	NOTOOL	S1	M	AM	9.981	1328	FISHEYE	NOTOOL	S1	M	AAJ	10.388	769
UNDISTORTED	NOTOOL	S1	M	AM	10.071	882	UNDISTORTED	NOTOOL	S1	M	AAJ	19.878	481
UNDISTORTED	NOTOOL	S1	M	AM	11.073	1161	UNDISTORTED	NOTOOL	S1	M	AAJ	13.687	1170
UNDISTORTED	NOTOOL	S1	M	AM	11.623	1147	UNDISTORTED	NOTOOL	S1	M	AAJ	10.728	1347
UNDISTORTED	NOTOOL	S1	M	AM	10.983	1236	UNDISTORTED	NOTOOL	S1	M	AAJ	11.157	1367
UNDISTORTED	NOTOOL	S1	M	AM	10.691	1120	UNDISTORTED	NOTOOL	S1	M	AAJ	9.751	1444
UNDISTORTED	NOTOOL	S1	M	AM	10.051	1064	UNDISTORTED	NOTOOL	S1	M	AAJ	12.169	2067
UNDISTORTED	NOTOOL	S1	M	AM	10.912	1438	UNDISTORTED	NOTOOL	S1	M	AAJ	10.521	1441
UNDISTORTED	NOTOOL	S1	M	AM	9.391	1617	UNDISTORTED	NOTOOL	S1	M	AAJ	9.573	910
UNDISTORTED	NOTOOL	S1	M	AM	9.884	1106	UNDISTORTED	NOTOOL	S1	M	AAJ	10.962	1343
UNDISTORTED	NOTOOL	S1	M	AM	10.289	1213	UNDISTORTED	NOTOOL	S1	M	AAJ	10.731	797
OCULUS	NOTOOL	S1	M	AM	14.146	1035	OCULUS	NOTOOL	S1	M	AAJ	11.238	510
OCULUS	NOTOOL	S1	M	AM	12.066	962	OCULUS	NOTOOL	S1	M	AAJ	10.952	734
OCULUS	NOTOOL	S1	M	AM	11.166	1477	OCULUS	NOTOOL	S1	M	AAJ	8.661	525
OCULUS	NOTOOL	S1	M	AM	11.855	1479	OCULUS	NOTOOL	S1	M	AAJ	9.593	843
OCULUS	NOTOOL	S1	M	AM	10.15	1120	OCULUS	NOTOOL	S1	M	AAJ	9.348	1063
OCULUS	NOTOOL	S1	M	AM	11.087	1242	OCULUS	NOTOOL	S1	M	AAJ	9.188	412
OCULUS	NOTOOL	S1	M	AM	11.565	397	OCULUS	NOTOOL	S1	M	AAJ	8.764	439
OCULUS	NOTOOL	S1	M	AM	10.294	1324	OCULUS	NOTOOL	S1	M	AAJ	10.076	1224
OCULUS	NOTOOL	S1	M	AM	11.573	1071	OCULUS	NOTOOL	S1	M	AAJ	9.218	889
OCULUS	NOTOOL	S1	M	AM	10.414	1221	OCULUS	NOTOOL	S1	M	AAJ	9.001	876
DIRECT	TOOL	S1	M	AM	7.224	345	DIRECT	TOOL	S1	M	AAJ	5.26	612
DIRECT	TOOL	S1	M	AM	7.394	610	DIRECT	TOOL	S1	M	AAJ	5.66	446
DIRECT	TOOL	S1	M	AM	8.58	312	DIRECT	TOOL	S1	M	AAJ	6.002	869
DIRECT	TOOL	S1	M	AM	7.817	672	DIRECT	TOOL	S1	M	AAJ	6.343	568
DIRECT	TOOL	S1	M	AM	9.068	396	DIRECT	TOOL	S1	M	AAJ	6.76	704
DIRECT	TOOL	S1	M	AM	8.204	472	DIRECT	TOOL	S1	M	AAJ	5.864	696
DIRECT	TOOL	S1	M	AM	7.897	349	DIRECT	TOOL	S1	M	AAJ	5.735	1024
DIRECT	TOOL	S1	M	AM	8.398	297	DIRECT	TOOL	S1	M	AAJ	5.526	896
DIRECT	TOOL	S1	M	AM	8.418	326	DIRECT	TOOL	S1	M	AAJ	5.633	897
DIRECT	TOOL	S1	M	AM	8.398	256	DIRECT	TOOL	S1	M	AAJ	5.658	545
FISHEYE	TOOL	S1	M	AM	12.259	667	FISHEYE	TOOL	S1	M	AAJ	15.202	741
FISHEYE	TOOL	S1	M	AM	11.511	930	FISHEYE	TOOL	S1	M	AAJ	11.797	961
FISHEYE	TOOL	S1	M	AM	11.329	743	FISHEYE	TOOL	S1	M	AAJ	11.633	747
FISHEYE	TOOL	S1	M	AM	10.962	1036	FISHEYE	TOOL	S1	M	AAJ	10.72	416
FISHEYE	TOOL	S1	M	AM	11.545	671	FISHEYE	TOOL	S1	M	AAJ	12.793	1165
FISHEYE	TOOL	S1	M	AM	12.164	866	FISHEYE	TOOL	S1	M	AAJ	12.398	313
FISHEYE	TOOL	S1	M	AM	10.068	1499	FISHEYE	TOOL	S1	M	AAJ	11.188	479
FISHEYE	TOOL	S1	M	AM	10.677	1009	FISHEYE	TOOL	S1	M	AAJ	9.994	936
FISHEYE	TOOL	S1	M	AM	12.181	1152	FISHEYE	TOOL	S1	M	AAJ	10.161	1044
FISHEYE	TOOL	S1	M	AM	11.041	1158	FISHEYE	TOOL	S1	M	AAJ	11.09	710
UNDISTORTED	TOOL	S1	M	AM	11.332	913	UNDISTORTED	TOOL	S1	M	AAJ	17.55	1086
UNDISTORTED	TOOL	S1	M	AM	12.274	1016	UNDISTORTED	TOOL	S1	M	AAJ	15.881	1019
UNDISTORTED	TOOL	S1	M	AM	10.976	1052	UNDISTORTED	TOOL	S1	M	AAJ	13.806	806
UNDISTORTED	TOOL	S1	M	AM	12.226	1422	UNDISTORTED	TOOL	S1	M	AAJ	11.436	1020
UNDISTORTED	TOOL	S1	M	AM	10.92	1587	UNDISTORTED	TOOL	S1	M	AAJ	12.097	1437
UNDISTORTED	TOOL	S1	M	AM	12.498	1172	UNDISTORTED	TOOL	S1	M	AAJ	11.602	1576
UNDISTORTED	TOOL	S1	M	AM	11.539	1081	UNDISTORTED	TOOL	S1	M	AAJ	11.987	1611
UNDISTORTED	TOOL	S1	M	AM	11.777	1117	UNDISTORTED	TOOL	S1	M	AAJ	11.7	1295
UNDISTORTED	TOOL	S1	M	AM	12.799	987	UNDISTORTED	TOOL	S1	M	AAJ	12.798	963
UNDISTORTED	TOOL	S1	M	AM	11.731	984	UNDISTORTED	TOOL	S1	M	AAJ	11.699	796
OCULUS	TOOL	S1	M	AM	12.505	1040	OCULUS	TOOL	S1	M	AAJ	12.935	1240
OCULUS	TOOL	S1	M	AM	13.864	1423	OCULUS	TOOL	S1	M	AAJ	11.483	898
OCULUS	TOOL	S1	M	AM	12.305	2288	OCULUS	TOOL	S1	M	AAJ	12.298	1165
OCULUS	TOOL	S1	M	AM	13.036	1505	OCULUS	TOOL	S1	M	AAJ	12.296	814
OCULUS	TOOL	S1	M	AM	13.539	1787	OCULUS	TOOL	S1	M	AAJ	11.175	943
OCULUS	TOOL	S1	M	AM	11.728	1768	OCULUS	TOOL	S1	M	AAJ	12.109	639
OCULUS	TOOL	S1	M	AM	11.719	1263	OCULUS	TOOL	S1	M	AAJ	11.025	697
OCULUS	TOOL	S1	M	AM	10.833	1162	OCULUS	TOOL	S1	M	AAJ	11.219	1125
OCULUS	TOOL	S1	M	AM	11.223	1989	OCULUS	TOOL	S1	M	AAJ	9.924	1294
OCULUS	TOOL	S1	M	AM	11.381	2238	OCULUS	TOOL	S1	M	AAJ	10.582	1119
DIRECT	NOTOOL	S2	M	AM	6.913	819	DIRECT	NOTOOL	S2	M	AAJ	5.36	365
DIRECT	NOTOOL	S2	M	AM	7.27	447	DIRECT	NOTOOL	S2	M	AAJ	5.855	574
DIRECT	NOTOOL	S2	M	AM	6.601	391	DIRECT	NOTOOL	S2	M	AAJ	5.97	478
DIRECT	NOTOOL	S2	M	AM	7.282	689	DIRECT	NOTOOL	S2	M	AAJ	5.636	585
DIRECT	NOTOOL	S2	M	AM	6.716	445	DIRECT	NOTOOL	S2	M	AAJ	5.407	521
DIRECT	NOTOOL	S2	M	AM	6.438	275	DIRECT	NOTOOL	S2	M	AAJ	4.967	1027
DIRECT	NOTOOL	S2	M	AM	6.987	529	DIRECT	NOTOOL	S2	M	AAJ	5.316	952
DIRECT	NOTOOL	S2	M	AM	6.541	412	DIRECT	NOTOOL	S2	M	AAJ	5.657	945
DIRECT	NOTOOL	S2	M	AM	6.861	941	DIRECT	NOTOOL	S2	M	AAJ	5.996	593
DIRECT	NOTOOL	S2	M	AM	7.718	660	DIRECT	NOTOOL	S2	M	AAJ	5.975	754
FISHEYE	NOTOOL	S2	M	AM	9.954	794	FISHEYE	NOTOOL	S2	M	AAJ	9.781	636
FISHEYE	NOTOOL	S2	M	AM	10.288	765	FISHEYE	NOTOOL	S2	M	AAJ	9.641	453
FISHEYE	NOTOOL	S2	M	AM	9.924	1159	FISHEYE	NOTOOL	S2	M	AAJ	8.884	900
FISHEYE	NOTOOL	S2	M	AM	9.346	1177	FISHEYE	NOTOOL	S2	M	AAJ	8.054	951
FISHEYE	NOTOOL	S2	M	AM	9.56	1277	FISHEYE	NOTOOL	S2	M	AAJ	8.405	644
FISHEYE	NOTOOL	S2	M	AM	8.99	1090	FISHEYE	NOTOOL	S2	M	AAJ	9.04	571
FISHEYE	NOTOOL	S2	M	AM	10.556	1106	FISHEYE	NOTOOL	S2	M	AAJ	8.06	926
FISHEYE	NOTOOL	S2	M	AM	10.454	1222	FISHEYE	NOTOOL	S2	M	AAJ	8.481	813
FISHEYE	NOTOOL	S2	M	AM	9.47	2092	FISHEYE	NOTOOL	S2	M	AAJ	8.883	813
FISHEYE	NOTOOL	S2	M	AM	9.169	1029	FISHEYE	NOTOOL	S2	M	AAJ	7.647	841
UNDISTORTED	NOTOOL	S2	M	AM	9.621	388	UNDISTORTED	NOTOOL	S2	M	AAJ	9.443	941
UNDISTORTED	NOTOOL	S2	M	AM	10.138	704	UNDISTORTED	NOTOOL	S2	M	AAJ	9.992	1053
UNDISTORTED	NOTOOL	S2	M	AM	10.638	1107	UNDISTORTED	NOTOOL	S2	M	AAJ	9.466	1090
UNDISTORTED	NOTOOL	S2	M	AM	10.191	669	UNDISTORTED	NOTOOL	S2	M	AAJ	9.365	995
UNDISTORTED	NOTOOL	S2	M	AM	9.855	1105	UNDISTORTED	NOTOOL	S2	M	AAJ	9.439	1037
UNDISTORTED	NOTOOL	S2	M	AM	10.208	818	UNDISTORTED	NOTOOL	S2	M	AAJ	8.885	1291
UNDISTORTED	NOTOOL	S2	M	AM	9.919	936	UNDISTORTED	NOTOOL	S2	M	AAJ	8.631	789
UNDISTORTED	NOTOOL	S2	M	AM	10.324	1178	UNDISTORTED	NOTOOL	S2	M	AAJ	7.95	1955
UNDISTORTED	NOTOOL	S2	M	AM	9.865	1191	UNDISTORTED	NOTOOL	S2	M	AAJ	8.92	1241
UNDISTORTED	NOTOOL	S2	M	AM	11.093	760	UNDISTORTED	NOTOOL	S2	M	AAJ	8.895	1196
OCULUS	NOTOOL	S2	M	AM	11.393	979	OCULUS	NOTOOL	S2	M	AAJ	9.83	1088
OCULUS	NOTOOL	S2	M	AM	10.475	738	OCULUS	NOTOOL	S2	M	AAJ	8.518	926
OCULUS	NOTOOL	S2	M	AM	10.347	1255	OCULUS	NOTOOL	S2	M	AAJ	8.875	1592
OCULUS	NOTOOL	S2	M	AM	10.437	984	OCULUS	NOTOOL	S2	M	AAJ	8.88	1303
OCULUS	NOTOOL	S2	M	AM	8.828	1313	OCULUS	NOTOOL	S2	M	AAJ	8.902	793
OCULUS	NOTOOL	S2	M	AM	9.599	963	OCULUS	NOTOOL	S2	M	AAJ	8.577	789
OCULUS	NOTOOL	S2	M	AM	9.793	1043	OCULUS	NOTOOL	S2	M	AAJ	8.647	1065
OCULUS	NOTOOL	S2	M	AM	9.754	868	OCULUS	NOTOOL	S2	M	AAJ	7.477	1192
OCULUS	NOTOOL	S2	M	AM	9.331	795	OCULUS	NOTOOL	S2	M	AAJ	7.503	713
OCULUS	NOTOOL	S2	M	AM	8.808	1456	OCULUS	NOTOOL	S2	M	AAJ	8.245	1042
DIRECT	TOOL	S2	M	AM	7.011	423	DIRECT	TOOL	S2	M	AAJ	6.61	509
DIRECT	TOOL	S2	M	AM	7.577	294	DIRECT	TOOL	S2	M	AAJ	6.787	248
DIRECT	TOOL	S2	M	AM	7.579	402	DIRECT	TOOL	S2	M	AAJ	6.933	449
DIRECT	TOOL	S2	M	AM	8.361	445	DIRECT	TOOL	S2	M	AAJ	6.803	425
DIRECT	TOOL	S2	M	AM	8.137	504	DIRECT	TOOL	S2	M	AAJ	6.514	383
DIRECT	TOOL	S2	M	AM	7.763	436	DIRECT	TOOL	S2	M	AAJ	6.68	228
DIRECT	TOOL	S2	M	AM	7.423	421	DIRECT	TOOL	S2	M	AAJ	6.797	221
DIRECT	TOOL	S2	M	AM	8.096	457	DIRECT	TOOL	S2	M	AAJ	6.366	277
DIRECT	TOOL	S2	M	AM	7.522	452	DIRECT	TOOL	S2	M	AAJ	6.454	391
DIRECT	TOOL	S2	M	AM	7.747	418	DIRECT	TOOL	S2	M	AAJ	6.399	521
FISHEYE	TOOL	S2	M	AM	10.568	731	FISHEYE	TOOL	S2	M	AAJ	10.071	439
FISHEYE	TOOL	S2	M	AM	10.913	836	FISHEYE	TOOL	S2	M	AAJ	9.439	705
FISHEYE	TOOL	S2	M	AM	10.049	898	FISHEYE	TOOL	S2	M	AAJ	9.902	394
FISHEYE	TOOL	S2	M	AM	10.744	598	FISHEYE	TOOL	S2	M	AAJ	10.253	821
FISHEYE	TOOL	S2	M	AM	10.232	941	FISHEYE	TOOL	S2	M	AAJ	9.751	279
FISHEYE	TOOL	S2	M	AM	10.465	822	FISHEYE	TOOL	S2	M	AAJ	10.528	475
FISHEYE	TOOL	S2	M	AM	9.837	1162	FISHEYE	TOOL	S2	M	AAJ	9.334	606
FISHEYE	TOOL	S2	M	AM	9.868	1136	FISHEYE	TOOL	S2	M	AAJ	9.234	597
FISHEYE	TOOL	S2	M	AM	11.199	892	FISHEYE	TOOL	S2	M	AAJ	9.343	555
FISHEYE	TOOL	S2	M	AM	10.725	1027	FISHEYE	TOOL	S2	M	AAJ	10.699	1228
UNDISTORTED	TOOL	S2	M	AM	10.492	710	UNDISTORTED	TOOL	S2	M	AAJ	9.898	905
UNDISTORTED	TOOL	S2	M	AM	11.365	1333	UNDISTORTED	TOOL	S2	M	AAJ	9.748	902
UNDISTORTED	TOOL	S2	M	AM	15.639	1009	UNDISTORTED	TOOL	S2	M	AAJ	9.065	1207
UNDISTORTED	TOOL	S2	M	AM	11.556	833	UNDISTORTED	TOOL	S2	M	AAJ	9.658	1180
UNDISTORTED	TOOL	S2	M	AM	11.021	1111	UNDISTORTED	TOOL	S2	M	AAJ	8.774	1177
UNDISTORTED	TOOL	S2	M	AM	11.901	857	UNDISTORTED	TOOL	S2	M	AAJ	10.314	848
UNDISTORTED	TOOL	S2	M	AM	11.168	1508	UNDISTORTED	TOOL	S2	M	AAJ	9.6	1929
UNDISTORTED	TOOL	S2	M	AM	10.748	933	UNDISTORTED	TOOL	S2	M	AAJ	9.997	1430
UNDISTORTED	TOOL	S2	M	AM	10.636	1118	UNDISTORTED	TOOL	S2	M	AAJ	9.664	974
UNDISTORTED	TOOL	S2	M	AM	11.563	1109	UNDISTORTED	TOOL	S2	M	AAJ	9.147	1395
OCULUS	TOOL	S2	M	AM	11.173	1039	OCULUS	TOOL	S2	M	AAJ	9.903	1144
OCULUS	TOOL	S2	M	AM	11.389	1958	OCULUS	TOOL	S2	M	AAJ	9.466	1229
OCULUS	TOOL	S2	M	AM	11.219	1660	OCULUS	TOOL	S2	M	AAJ	9.353	870
OCULUS	TOOL	S2	M	AM	10.839	1666	OCULUS	TOOL	S2	M	AAJ	9.821	1290
OCULUS	TOOL	S2	M	AM	10.703	1862	OCULUS	TOOL	S2	M	AAJ	9.61	970
OCULUS	TOOL	S2	M	AM	11.443	1877	OCULUS	TOOL	S2	M	AAJ	8.474	1010
OCULUS	TOOL	S2	M	AM	10.717	1356	OCULUS	TOOL	S2	M	AAJ	9.191	1077
OCULUS	TOOL	S2	M	AM	11.467	1912	OCULUS	TOOL	S2	M	AAJ	9.153	1374
OCULUS	TOOL	S2	M	AM	10.959	2415	OCULUS	TOOL	S2	M	AAJ	8.493	1165
OCULUS	TOOL	S2	M	AM	11.206	1806	OCULUS	TOOL	S2	M	AAJ	8.777	1528
DIRECT	NOTOOL	S1	M	FA	4.763	1454	DIRECT	NOTOOL	S1	F	AK	8.889	893
DIRECT	NOTOOL	S1	M	FA	4.349	793	DIRECT	NOTOOL	S1	F	AK	8.762	55
DIRECT	NOTOOL	S1	M	FA	4.132	1032	DIRECT	NOTOOL	S1	F	AK	8.074	431
DIRECT	NOTOOL	S1	M	FA	4.125	1312	DIRECT	NOTOOL	S1	F	AK	7.759	658
DIRECT	NOTOOL	S1	M	FA	3.943	1032	DIRECT	NOTOOL	S1	F	AK	8.199	733
DIRECT	NOTOOL	S1	M	FA	4.03	1001	DIRECT	NOTOOL	S1	F	AK	7.792	459
DIRECT	NOTOOL	S1	M	FA	3.714	855	DIRECT	NOTOOL	S1	F	AK	7.108	664
DIRECT	NOTOOL	S1	M	FA	4.005	1416	DIRECT	NOTOOL	S1	F	AK	7.322	796
DIRECT	NOTOOL	S1	M	FA	4.035	865	DIRECT	NOTOOL	S1	F	AK	7.659	525
DIRECT	NOTOOL	S1	M	FA	3.919	832	DIRECT	NOTOOL	S1	F	AK	7.919	499
FISHEYE	NOTOOL	S1	M	FA	9.42	672	FISHEYE	NOTOOL	S1	F	AK	13.792	1170
FISHEYE	NOTOOL	S1	M	FA	7.264	909	FISHEYE	NOTOOL	S1	F	AK	15.223	411
FISHEYE	NOTOOL	S1	M	FA	7.181	735	FISHEYE	NOTOOL	S1	F	AK	14.515	298
FISHEYE	NOTOOL	S1	M	FA	7.233	632	FISHEYE	NOTOOL	S1	F	AK	15.012	416
FISHEYE	NOTOOL	S1	M	FA	7.78	1651	FISHEYE	NOTOOL	S1	F	AK	13.681	963
FISHEYE	NOTOOL	S1	M	FA	8.443	601	FISHEYE	NOTOOL	S1	F	AK	12.902	581
FISHEYE	NOTOOL	S1	M	FA	7.502	1089	FISHEYE	NOTOOL	S1	F	AK	12.604	330
FISHEYE	NOTOOL	S1	M	FA	7.324	1040	FISHEYE	NOTOOL	S1	F	AK	12.051	537
FISHEYE	NOTOOL	S1	M	FA	7.179	526	FISHEYE	NOTOOL	S1	F	AK	13.229	804
FISHEYE	NOTOOL	S1	M	FA	7.102	1467	FISHEYE	NOTOOL	S1	F	AK	13.029	949
UNDISTORTED	NOTOOL	S1	M	FA	10.229	683	UNDISTORTED	NOTOOL	S1	F	AK	16.551	532
UNDISTORTED	NOTOOL	S1	M	FA	8.477	1155	UNDISTORTED	NOTOOL	S1	F	AK	16.462	1306
UNDISTORTED	NOTOOL	S1	M	FA	6.87	1705	UNDISTORTED	NOTOOL	S1	F	AK	15.778	1362
UNDISTORTED	NOTOOL	S1	M	FA	6.834	1481	UNDISTORTED	NOTOOL	S1	F	AK	14.021	586
UNDISTORTED	NOTOOL	S1	M	FA	7.018	1324	UNDISTORTED	NOTOOL	S1	F	AK	14.377	1008
UNDISTORTED	NOTOOL	S1	M	FA	7.981	1361	UNDISTORTED	NOTOOL	S1	F	AK	16.383	343
UNDISTORTED	NOTOOL	S1	M	FA	7.273	1580	UNDISTORTED	NOTOOL	S1	F	AK	12.764	1308
UNDISTORTED	NOTOOL	S1	M	FA	7.104	621	UNDISTORTED	NOTOOL	S1	F	AK	13.999	557
UNDISTORTED	NOTOOL	S1	M	FA	7.154	2040	UNDISTORTED	NOTOOL	S1	F	AK	14.568	757
UNDISTORTED	NOTOOL	S1	M	FA	7.018	1641	UNDISTORTED	NOTOOL	S1	F	AK	12.487	1335
OCULUS	NOTOOL	S1	M	FA	8.113	1418	OCULUS	NOTOOL	S1	F	AK	16.107	571
OCULUS	NOTOOL	S1	M	FA	9.865	1532	OCULUS	NOTOOL	S1	F	AK	15.153	1411
OCULUS	NOTOOL	S1	M	FA	6.986	691	OCULUS	NOTOOL	S1	F	AK	15.35	850
OCULUS	NOTOOL	S1	M	FA	8.612	2814	OCULUS	NOTOOL	S1	F	AK	14.542	1020
OCULUS	NOTOOL	S1	M	FA	7.26	1221	OCULUS	NOTOOL	S1	F	AK	14.678	1000
OCULUS	NOTOOL	S1	M	FA	7.826	1307	OCULUS	NOTOOL	S1	F	AK	15.094	825
OCULUS	NOTOOL	S1	M	FA	7.824	1011	OCULUS	NOTOOL	S1	F	AK	13.741	1025
OCULUS	NOTOOL	S1	M	FA	7.577	764	OCULUS	NOTOOL	S1	F	AK	12.997	640
OCULUS	NOTOOL	S1	M	FA	8.091	1856	OCULUS	NOTOOL	S1	F	AK	12.94	957
OCULUS	NOTOOL	S1	M	FA	8.282	1197	OCULUS	NOTOOL	S1	F	AK	13.169	1120
DIRECT	TOOL	S1	M	FA	5.377	640	DIRECT	TOOL	S1	F	AK	8.888	273
DIRECT	TOOL	S1	M	FA	4.404	1361	DIRECT	TOOL	S1	F	AK	8.64	251
DIRECT	TOOL	S1	M	FA	4.652	917	DIRECT	TOOL	S1	F	AK	8.853	246
DIRECT	TOOL	S1	M	FA	4.716	742	DIRECT	TOOL	S1	F	AK	8.673	484
DIRECT	TOOL	S1	M	FA	4.737	505	DIRECT	TOOL	S1	F	AK	8.31	453
DIRECT	TOOL	S1	M	FA	4.696	824	DIRECT	TOOL	S1	F	AK	7.916	197
DIRECT	TOOL	S1	M	FA	4.523	766	DIRECT	TOOL	S1	F	AK	8.015	266
DIRECT	TOOL	S1	M	FA	4.485	1442	DIRECT	TOOL	S1	F	AK	7.828	245
DIRECT	TOOL	S1	M	FA	4.208	1349	DIRECT	TOOL	S1	F	AK	8.046	246
DIRECT	TOOL	S1	M	FA	4.234	1296	DIRECT	TOOL	S1	F	AK	7.971	247
FISHEYE	TOOL	S1	M	FA	10.282	450	FISHEYE	TOOL	S1	F	AK	14.249	1181
FISHEYE	TOOL	S1	M	FA	10.089	2273	FISHEYE	TOOL	S1	F	AK	15.308	1272
FISHEYE	TOOL	S1	M	FA	12.621	1862	FISHEYE	TOOL	S1	F	AK	15.089	1115
FISHEYE	TOOL	S1	M	FA	9.686	1434	FISHEYE	TOOL	S1	F	AK	14.841	1149
FISHEYE	TOOL	S1	M	FA	10.821	1652	FISHEYE	TOOL	S1	F	AK	15.389	1135
FISHEYE	TOOL	S1	M	FA	10.024	1507	FISHEYE	TOOL	S1	F	AK	15.771	565
FISHEYE	TOOL	S1	M	FA	10.079	2377	FISHEYE	TOOL	S1	F	AK	14.499	856
FISHEYE	TOOL	S1	M	FA	8.81	1777	FISHEYE	TOOL	S1	F	AK	13.764	943
FISHEYE	TOOL	S1	M	FA	9.078	1790	FISHEYE	TOOL	S1	F	AK	14.364	480
FISHEYE	TOOL	S1	M	FA	9.487	1485	FISHEYE	TOOL	S1	F	AK	14.832	656
UNDISTORTED	TOOL	S1	M	FA	7.907	1160	UNDISTORTED	TOOL	S1	F	AK	20.367	1059
UNDISTORTED	TOOL	S1	M	FA	7.8	867	UNDISTORTED	TOOL	S1	F	AK	16.553	1626
UNDISTORTED	TOOL	S1	M	FA	7.9	1631	UNDISTORTED	TOOL	S1	F	AK	15.621	1059
UNDISTORTED	TOOL	S1	M	FA	8.017	2178	UNDISTORTED	TOOL	S1	F	AK	17.999	961
UNDISTORTED	TOOL	S1	M	FA	8.515	1120	UNDISTORTED	TOOL	S1	F	AK	16.272	1166
UNDISTORTED	TOOL	S1	M	FA	10.04	1783	UNDISTORTED	TOOL	S1	F	AK	15.059	1030
UNDISTORTED	TOOL	S1	M	FA	7.847	1747	UNDISTORTED	TOOL	S1	F	AK	16.543	1013
UNDISTORTED	TOOL	S1	M	FA	8.029	1822	UNDISTORTED	TOOL	S1	F	AK	15.989	1605
UNDISTORTED	TOOL	S1	M	FA	14.036	1776	UNDISTORTED	TOOL	S1	F	AK	15.534	838
UNDISTORTED	TOOL	S1	M	FA	10.179	1609	UNDISTORTED	TOOL	S1	F	AK	14.009	1279
OCULUS	TOOL	S1	M	FA	10.732	2632	OCULUS	TOOL	S1	F	AK	20.884	1465
OCULUS	TOOL	S1	M	FA	12.729	2927	OCULUS	TOOL	S1	F	AK	16.715	1887
OCULUS	TOOL	S1	M	FA	10.094	1665	OCULUS	TOOL	S1	F	AK	17.887	1578
OCULUS	TOOL	S1	M	FA	11.602	1522	OCULUS	TOOL	S1	F	AK	18.431	2083
OCULUS	TOOL	S1	M	FA	10.695	1922	OCULUS	TOOL	S1	F	AK	18.003	1346
OCULUS	TOOL	S1	M	FA	10.077	2988	OCULUS	TOOL	S1	F	AK	15.938	1855
OCULUS	TOOL	S1	M	FA	11.052	2619	OCULUS	TOOL	S1	F	AK	14.59	2226
OCULUS	TOOL	S1	M	FA	11.28	3225	OCULUS	TOOL	S1	F	AK	16.176	1554
OCULUS	TOOL	S1	M	FA	10.337	1884	OCULUS	TOOL	S1	F	AK	15.841	1919
OCULUS	TOOL	S1	M	FA	9.605	3138	OCULUS	TOOL	S1	F	AK	15.986	1588
DIRECT	NOTOOL	S2	M	FA	3.585	1801	DIRECT	NOTOOL	S2	F	AK	7.876	644
DIRECT	NOTOOL	S2	M	FA	3.287	1639	DIRECT	NOTOOL	S2	F	AK	7.39	832
DIRECT	NOTOOL	S2	M	FA	3.14	1684	DIRECT	NOTOOL	S2	F	AK	7.906	329
DIRECT	NOTOOL	S2	M	FA	3.384	1708	DIRECT	NOTOOL	S2	F	AK	7.565	540
DIRECT	NOTOOL	S2	M	FA	3.276	1866	DIRECT	NOTOOL	S2	F	AK	7.388	738
DIRECT	NOTOOL	S2	M	FA	3.549	1238	DIRECT	NOTOOL	S2	F	AK	7.267	507
DIRECT	NOTOOL	S2	M	FA	3.187	1848	DIRECT	NOTOOL	S2	F	AK	7.234	583
DIRECT	NOTOOL	S2	M	FA	3.367	1734	DIRECT	NOTOOL	S2	F	AK	7.738	872
DIRECT	NOTOOL	S2	M	FA	3.328	2120	DIRECT	NOTOOL	S2	F	AK	7.529	603
DIRECT	NOTOOL	S2	M	FA	4.164	1380	DIRECT	NOTOOL	S2	F	AK	7.666	300
FISHEYE	NOTOOL	S2	M	FA	6.83	1354	FISHEYE	NOTOOL	S2	F	AK	13.809	1015
FISHEYE	NOTOOL	S2	M	FA	6.136	1596	FISHEYE	NOTOOL	S2	F	AK	11.746	1255
FISHEYE	NOTOOL	S2	M	FA	6.022	1490	FISHEYE	NOTOOL	S2	F	AK	12.985	635
FISHEYE	NOTOOL	S2	M	FA	5.374	1639	FISHEYE	NOTOOL	S2	F	AK	11.089	965
FISHEYE	NOTOOL	S2	M	FA	5.932	2019	FISHEYE	NOTOOL	S2	F	AK	11.985	514
FISHEYE	NOTOOL	S2	M	FA	5.813	1960	FISHEYE	NOTOOL	S2	F	AK	11.678	833
FISHEYE	NOTOOL	S2	M	FA	7.374	2499	FISHEYE	NOTOOL	S2	F	AK	11.472	893
FISHEYE	NOTOOL	S2	M	FA	5.909	2227	FISHEYE	NOTOOL	S2	F	AK	11.686	951
FISHEYE	NOTOOL	S2	M	FA	6.356	1610	FISHEYE	NOTOOL	S2	F	AK	11.778	766
FISHEYE	NOTOOL	S2	M	FA	5.765	1582	FISHEYE	NOTOOL	S2	F	AK	11.028	682
UNDISTORTED	NOTOOL	S2	M	FA	5.597	948	UNDISTORTED	NOTOOL	S2	F	AK	11.085	516
UNDISTORTED	NOTOOL	S2	M	FA	5.707	1196	UNDISTORTED	NOTOOL	S2	F	AK	10.034	1133
UNDISTORTED	NOTOOL	S2	M	FA	6.329	635	UNDISTORTED	NOTOOL	S2	F	AK	10.642	727
UNDISTORTED	NOTOOL	S2	M	FA	6.967	495	UNDISTORTED	NOTOOL	S2	F	AK	10.404	951
UNDISTORTED	NOTOOL	S2	M	FA	6.121	1135	UNDISTORTED	NOTOOL	S2	F	AK	10.56	727
UNDISTORTED	NOTOOL	S2	M	FA	6.059	1155	UNDISTORTED	NOTOOL	S2	F	AK	10.361	1280
UNDISTORTED	NOTOOL	S2	M	FA	6.462	1253	UNDISTORTED	NOTOOL	S2	F	AK	10.66	846
UNDISTORTED	NOTOOL	S2	M	FA	6.798	1519	UNDISTORTED	NOTOOL	S2	F	AK	10.84	828
UNDISTORTED	NOTOOL	S2	M	FA	6.436	1270	UNDISTORTED	NOTOOL	S2	F	AK	10.011	1356
UNDISTORTED	NOTOOL	S2	M	FA	6.906	1476	UNDISTORTED	NOTOOL	S2	F	AK	10.598	1104
OCULUS	NOTOOL	S2	M	FA	6.66	2897	OCULUS	NOTOOL	S2	F	AK	15.001	1884
OCULUS	NOTOOL	S2	M	FA	5.827	2034	OCULUS	NOTOOL	S2	F	AK	11.849	1549
OCULUS	NOTOOL	S2	M	FA	6.086	2847	OCULUS	NOTOOL	S2	F	AK	11.624	558
OCULUS	NOTOOL	S2	M	FA	5.325	3158	OCULUS	NOTOOL	S2	F	AK	12.1	532
OCULUS	NOTOOL	S2	M	FA	6.211	4119	OCULUS	NOTOOL	S2	F	AK	12.027	1100
OCULUS	NOTOOL	S2	M	FA	8.076	2304	OCULUS	NOTOOL	S2	F	AK	11.2	1016
OCULUS	NOTOOL	S2	M	FA	6.706	1988	OCULUS	NOTOOL	S2	F	AK	11.229	797
OCULUS	NOTOOL	S2	M	FA	7.577	2737	OCULUS	NOTOOL	S2	F	AK	12.382	650
OCULUS	NOTOOL	S2	M	FA	7.213	2459	OCULUS	NOTOOL	S2	F	AK	12.347	623
OCULUS	NOTOOL	S2	M	FA	6.728	1843	OCULUS	NOTOOL	S2	F	AK	11.657	988
DIRECT	TOOL	S2	M	FA	3.721	1940	DIRECT	TOOL	S2	F	AK	8.321	616
DIRECT	TOOL	S2	M	FA	4.016	1909	DIRECT	TOOL	S2	F	AK	8.311	406
DIRECT	TOOL	S2	M	FA	3.801	1309	DIRECT	TOOL	S2	F	AK	8.265	378
DIRECT	TOOL	S2	M	FA	4.053	1002	DIRECT	TOOL	S2	F	AK	8.496	304
DIRECT	TOOL	S2	M	FA	3.933	1807	DIRECT	TOOL	S2	F	AK	8.71	424
DIRECT	TOOL	S2	M	FA	3.833	886	DIRECT	TOOL	S2	F	AK	8.336	534
DIRECT	TOOL	S2	M	FA	3.737	1863	DIRECT	TOOL	S2	F	AK	8.518	369
DIRECT	TOOL	S2	M	FA	3.822	1859	DIRECT	TOOL	S2	F	AK	7.887	486
DIRECT	TOOL	S2	M	FA	3.362	1238	DIRECT	TOOL	S2	F	AK	8.067	494
DIRECT	TOOL	S2	M	FA	3.622	1925	DIRECT	TOOL	S2	F	AK	8.445	381
FISHEYE	TOOL	S2	M	FA	8.138	813	FISHEYE	TOOL	S2	F	AK	13.189	1071
FISHEYE	TOOL	S2	M	FA	6.962	870	FISHEYE	TOOL	S2	F	AK	14.189	672
FISHEYE	TOOL	S2	M	FA	6.97	964	FISHEYE	TOOL	S2	F	AK	13.685	1147
FISHEYE	TOOL	S2	M	FA	7.37	1490	FISHEYE	TOOL	S2	F	AK	15.246	1206
FISHEYE	TOOL	S2	M	FA	6.742	1343	FISHEYE	TOOL	S2	F	AK	13.751	1201
FISHEYE	TOOL	S2	M	FA	6.999	738	FISHEYE	TOOL	S2	F	AK	14.025	618
FISHEYE	TOOL	S2	M	FA	8.982	1590	FISHEYE	TOOL	S2	F	AK	13.794	632
FISHEYE	TOOL	S2	M	FA	6.536	689	FISHEYE	TOOL	S2	F	AK	12.012	570
FISHEYE	TOOL	S2	M	FA	7.063	1916	FISHEYE	TOOL	S2	F	AK	14.094	964
FISHEYE	TOOL	S2	M	FA	7.193	1282	FISHEYE	TOOL	S2	F	AK	13.44	922
UNDISTORTED	TOOL	S2	M	FA	9.008	889	UNDISTORTED	TOOL	S2	F	AK	10.96	1718
UNDISTORTED	TOOL	S2	M	FA	10.87	961	UNDISTORTED	TOOL	S2	F	AK	12.257	1755
UNDISTORTED	TOOL	S2	M	FA	12.444	696	UNDISTORTED	TOOL	S2	F	AK	10.657	1771
UNDISTORTED	TOOL	S2	M	FA	9.13	1330	UNDISTORTED	TOOL	S2	F	AK	12.768	1134
UNDISTORTED	TOOL	S2	M	FA	10.123	811	UNDISTORTED	TOOL	S2	F	AK	12.196	1247
UNDISTORTED	TOOL	S2	M	FA	10.299	567	UNDISTORTED	TOOL	S2	F	AK	12.511	1723
UNDISTORTED	TOOL	S2	M	FA	10.43	1006	UNDISTORTED	TOOL	S2	F	AK	12.494	1156
UNDISTORTED	TOOL	S2	M	FA	9.798	878	UNDISTORTED	TOOL	S2	F	AK	12.341	660
UNDISTORTED	TOOL	S2	M	FA	8.989	680	UNDISTORTED	TOOL	S2	F	AK	11.606	998
UNDISTORTED	TOOL	S2	M	FA	8.061	1247	UNDISTORTED	TOOL	S2	F	AK	11.673	923
OCULUS	TOOL	S2	M	FA	10.519	1772	OCULUS	TOOL	S2	F	AK	16.323	989
OCULUS	TOOL	S2	M	FA	10.623	2229	OCULUS	TOOL	S2	F	AK	14.727	1746
OCULUS	TOOL	S2	M	FA	10.883	2191	OCULUS	TOOL	S2	F	AK	14.868	1413
OCULUS	TOOL	S2	M	FA	9.019	2152	OCULUS	TOOL	S2	F	AK	14.367	1191
OCULUS	TOOL	S2	M	FA	9.18	2218	OCULUS	TOOL	S2	F	AK	13.526	648
OCULUS	TOOL	S2	M	FA	9.917	2159	OCULUS	TOOL	S2	F	AK	14.356	867
OCULUS	TOOL	S2	M	FA	9.552	2773	OCULUS	TOOL	S2	F	AK	13.804	993
OCULUS	TOOL	S2	M	FA	8.328	1599	OCULUS	TOOL	S2	F	AK	13.551	762
OCULUS	TOOL	S2	M	FA	8.625	2430	OCULUS	TOOL	S2	F	AK	13.739	954
OCULUS	TOOL	S2	M	FA	8.965	2849	OCULUS	TOOL	S2	F	AK	15.614	889
DIRECT	NOTOOL	S1	M	MSY	5.085	646	DIRECT	NOTOOL	S1	M	DY	11.018	98
DIRECT	NOTOOL	S1	M	MSY	4.658	1110	DIRECT	NOTOOL	S1	M	DY	8.334	255
DIRECT	NOTOOL	S1	M	MSY	4.742	833	DIRECT	NOTOOL	S1	M	DY	8.848	887
DIRECT	NOTOOL	S1	M	MSY	4.49	478	DIRECT	NOTOOL	S1	M	DY	8.404	665
DIRECT	NOTOOL	S1	M	MSY	4.8	760	DIRECT	NOTOOL	S1	M	DY	8.075	343
DIRECT	NOTOOL	S1	M	MSY	4.499	931	DIRECT	NOTOOL	S1	M	DY	7.671	415
DIRECT	NOTOOL	S1	M	MSY	4.393	468	DIRECT	NOTOOL	S1	M	DY	7.593	261
DIRECT	NOTOOL	S1	M	MSY	4.263	817	DIRECT	NOTOOL	S1	M	DY	7.479	384
DIRECT	NOTOOL	S1	M	MSY	4.767	922	DIRECT	NOTOOL	S1	M	DY	7.519	577
DIRECT	NOTOOL	S1	M	MSY	4.16	1096	DIRECT	NOTOOL	S1	M	DY	7.747	615
FISHEYE	NOTOOL	S1	M	MSY	14.413	589	FISHEYE	NOTOOL	S1	M	DY	15.005	374
FISHEYE	NOTOOL	S1	M	MSY	12.095	758	FISHEYE	NOTOOL	S1	M	DY	12.799	780
FISHEYE	NOTOOL	S1	M	MSY	14.948	598	FISHEYE	NOTOOL	S1	M	DY	14.727	601
FISHEYE	NOTOOL	S1	M	MSY	16.265	1142	FISHEYE	NOTOOL	S1	M	DY	13.429	934
FISHEYE	NOTOOL	S1	M	MSY	15.054	925	FISHEYE	NOTOOL	S1	M	DY	13.561	1078
FISHEYE	NOTOOL	S1	M	MSY	16.252	703	FISHEYE	NOTOOL	S1	M	DY	14.472	902
FISHEYE	NOTOOL	S1	M	MSY	12.395	1195	FISHEYE	NOTOOL	S1	M	DY	17.558	938
FISHEYE	NOTOOL	S1	M	MSY	12.247	712	FISHEYE	NOTOOL	S1	M	DY	16.045	1174
FISHEYE	NOTOOL	S1	M	MSY	11.736	644	FISHEYE	NOTOOL	S1	M	DY	17.055	878
FISHEYE	NOTOOL	S1	M	MSY	13.078	830	FISHEYE	NOTOOL	S1	M	DY	15.975	764
UNDISTORTED	NOTOOL	S1	M	MSY	15.259	1193	UNDISTORTED	NOTOOL	S1	M	DY	19.138	986
UNDISTORTED	NOTOOL	S1	M	MSY	15.671	714	UNDISTORTED	NOTOOL	S1	M	DY	15.908	233
UNDISTORTED	NOTOOL	S1	M	MSY	12.763	987	UNDISTORTED	NOTOOL	S1	M	DY	13.769	1135
UNDISTORTED	NOTOOL	S1	M	MSY	10.997	722	UNDISTORTED	NOTOOL	S1	M	DY	14.666	743
UNDISTORTED	NOTOOL	S1	M	MSY	14.622	1424	UNDISTORTED	NOTOOL	S1	M	DY	15.011	1125
UNDISTORTED	NOTOOL	S1	M	MSY	10.985	1368	UNDISTORTED	NOTOOL	S1	M	DY	14.469	871
UNDISTORTED	NOTOOL	S1	M	MSY	10.62	1664	UNDISTORTED	NOTOOL	S1	M	DY	13.137	1068
UNDISTORTED	NOTOOL	S1	M	MSY	10.119	1183	UNDISTORTED	NOTOOL	S1	M	DY	13.127	1147
UNDISTORTED	NOTOOL	S1	M	MSY	12.713	1218	UNDISTORTED	NOTOOL	S1	M	DY	13.252	1021
UNDISTORTED	NOTOOL	S1	M	MSY	13.685	1202	UNDISTORTED	NOTOOL	S1	M	DY	15.972	1555
OCULUS	NOTOOL	S1	M	MSY	16.533	1646	OCULUS	NOTOOL	S1	M	DY	15.933	698
OCULUS	NOTOOL	S1	M	MSY	15.004	1601	OCULUS	NOTOOL	S1	M	DY	14.375	1074
OCULUS	NOTOOL	S1	M	MSY	17.081	1105	OCULUS	NOTOOL	S1	M	DY	13.257	1267
OCULUS	NOTOOL	S1	M	MSY	16.2	1672	OCULUS	NOTOOL	S1	M	DY	13.733	1040
OCULUS	NOTOOL	S1	M	MSY	13.413	1875	OCULUS	NOTOOL	S1	M	DY	13.68	853
OCULUS	NOTOOL	S1	M	MSY	13.842	2006	OCULUS	NOTOOL	S1	M	DY	15.284	1075
OCULUS	NOTOOL	S1	M	MSY	11.209	1658	OCULUS	NOTOOL	S1	M	DY	14.883	987
OCULUS	NOTOOL	S1	M	MSY	10.61	2025	OCULUS	NOTOOL	S1	M	DY	15.055	404
OCULUS	NOTOOL	S1	M	MSY	12.355	1699	OCULUS	NOTOOL	S1	M	DY	13.578	752
OCULUS	NOTOOL	S1	M	MSY	11.997	1559	OCULUS	NOTOOL	S1	M	DY	14.283	1937
DIRECT	TOOL	S1	M	MSY	4.817	702	DIRECT	TOOL	S1	M	DY	9.135	397
DIRECT	TOOL	S1	M	MSY	4.749	682	DIRECT	TOOL	S1	M	DY	9.276	647
DIRECT	TOOL	S1	M	MSY	4.699	933	DIRECT	TOOL	S1	M	DY	8.398	402
DIRECT	TOOL	S1	M	MSY	4.892	934	DIRECT	TOOL	S1	M	DY	8.111	542
DIRECT	TOOL	S1	M	MSY	4.797	869	DIRECT	TOOL	S1	M	DY	7.775	351
DIRECT	TOOL	S1	M	MSY	4.679	708	DIRECT	TOOL	S1	M	DY	7.751	489
DIRECT	TOOL	S1	M	MSY	4.516	969	DIRECT	TOOL	S1	M	DY	9.692	297
DIRECT	TOOL	S1	M	MSY	4.506	1495	DIRECT	TOOL	S1	M	DY	8.487	464
DIRECT	TOOL	S1	M	MSY	4.796	613	DIRECT	TOOL	S1	M	DY	8.814	306
DIRECT	TOOL	S1	M	MSY	5.116	858	DIRECT	TOOL	S1	M	DY	8.97	464
FISHEYE	TOOL	S1	M	MSY	16.622	1319	FISHEYE	TOOL	S1	M	DY	18.198	622
FISHEYE	TOOL	S1	M	MSY	16.993	1266	FISHEYE	TOOL	S1	M	DY	17.379	408
FISHEYE	TOOL	S1	M	MSY	16.457	1376	FISHEYE	TOOL	S1	M	DY	18.801	858
FISHEYE	TOOL	S1	M	MSY	17.6	752	FISHEYE	TOOL	S1	M	DY	14.598	450
FISHEYE	TOOL	S1	M	MSY	14.616	1064	FISHEYE	TOOL	S1	M	DY	15.334	580
FISHEYE	TOOL	S1	M	MSY	13.075	1679	FISHEYE	TOOL	S1	M	DY	15.291	352
FISHEYE	TOOL	S1	M	MSY	11.666	852	FISHEYE	TOOL	S1	M	DY	15.517	858
FISHEYE	TOOL	S1	M	MSY	14.536	882	FISHEYE	TOOL	S1	M	DY	15.272	357
FISHEYE	TOOL	S1	M	MSY	17.23	455	FISHEYE	TOOL	S1	M	DY	13.32	534
FISHEYE	TOOL	S1	M	MSY	16.61	686	FISHEYE	TOOL	S1	M	DY	14.542	583
UNDISTORTED	TOOL	S1	M	MSY	12.567	1048	UNDISTORTED	TOOL	S1	M	DY	19.806	693
UNDISTORTED	TOOL	S1	M	MSY	14.852	1477	UNDISTORTED	TOOL	S1	M	DY	18.89	764
UNDISTORTED	TOOL	S1	M	MSY	13.76	1014	UNDISTORTED	TOOL	S1	M	DY	21.949	391
UNDISTORTED	TOOL	S1	M	MSY	13.002	1373	UNDISTORTED	TOOL	S1	M	DY	20.271	743
UNDISTORTED	TOOL	S1	M	MSY	12.028	1468	UNDISTORTED	TOOL	S1	M	DY	19.279	1162
UNDISTORTED	TOOL	S1	M	MSY	10.955	887	UNDISTORTED	TOOL	S1	M	DY	18.632	1111
UNDISTORTED	TOOL	S1	M	MSY	11.562	1102	UNDISTORTED	TOOL	S1	M	DY	17.966	562
UNDISTORTED	TOOL	S1	M	MSY	12.59	1013	UNDISTORTED	TOOL	S1	M	DY	17.999	888
UNDISTORTED	TOOL	S1	M	MSY	13.109	1149	UNDISTORTED	TOOL	S1	M	DY	17.232	510
UNDISTORTED	TOOL	S1	M	MSY	13.236	991	UNDISTORTED	TOOL	S1	M	DY	17.924	894
OCULUS	TOOL	S1	M	MSY	17.463	2229	OCULUS	TOOL	S1	M	DY	16.548	2076
OCULUS	TOOL	S1	M	MSY	15.636	1753	OCULUS	TOOL	S1	M	DY	15.384	1366
OCULUS	TOOL	S1	M	MSY	14.75	1775	OCULUS	TOOL	S1	M	DY	12.916	1425
OCULUS	TOOL	S1	M	MSY	14.936	1954	OCULUS	TOOL	S1	M	DY	13.415	1591
OCULUS	TOOL	S1	M	MSY	15.178	2153	OCULUS	TOOL	S1	M	DY	13.726	2709
OCULUS	TOOL	S1	M	MSY	14.118	2004	OCULUS	TOOL	S1	M	DY	14.701	1485
OCULUS	TOOL	S1	M	MSY	13.627	1912	OCULUS	TOOL	S1	M	DY	14.675	1355
OCULUS	TOOL	S1	M	MSY	14.148	1329	OCULUS	TOOL	S1	M	DY	15.384	1268
OCULUS	TOOL	S1	M	MSY	13.015	2072	OCULUS	TOOL	S1	M	DY	11.943	1201
OCULUS	TOOL	S1	M	MSY	11.708	1805	OCULUS	TOOL	S1	M	DY	13.184	1314
DIRECT	NOTOOL	S2	M	MSY	4.343	863	DIRECT	NOTOOL	S2	M	DY	9.442	422
DIRECT	NOTOOL	S2	M	MSY	4.125	758	DIRECT	NOTOOL	S2	M	DY	9.356	153
DIRECT	NOTOOL	S2	M	MSY	4.126	463	DIRECT	NOTOOL	S2	M	DY	8.442	374
DIRECT	NOTOOL	S2	M	MSY	4.831	426	DIRECT	NOTOOL	S2	M	DY	8.429	303
DIRECT	NOTOOL	S2	M	MSY	4.699	391	DIRECT	NOTOOL	S2	M	DY	8.824	307
DIRECT	NOTOOL	S2	M	MSY	5.271	664	DIRECT	NOTOOL	S2	M	DY	9.136	339
DIRECT	NOTOOL	S2	M	MSY	4.434	639	DIRECT	NOTOOL	S2	M	DY	9.684	482
DIRECT	NOTOOL	S2	M	MSY	4.367	843	DIRECT	NOTOOL	S2	M	DY	9.182	256
DIRECT	NOTOOL	S2	M	MSY	4.472	757	DIRECT	NOTOOL	S2	M	DY	9.448	141
DIRECT	NOTOOL	S2	M	MSY	4.225	244	DIRECT	NOTOOL	S2	M	DY	9.63	239
FISHEYE	NOTOOL	S2	M	MSY	9.657	871	FISHEYE	NOTOOL	S2	M	DY	17.569	462
FISHEYE	NOTOOL	S2	M	MSY	9.952	808	FISHEYE	NOTOOL	S2	M	DY	16.51	1128
FISHEYE	NOTOOL	S2	M	MSY	9.077	801	FISHEYE	NOTOOL	S2	M	DY	15.928	1194
FISHEYE	NOTOOL	S2	M	MSY	8.996	999	FISHEYE	NOTOOL	S2	M	DY	16.661	1060
FISHEYE	NOTOOL	S2	M	MSY	9.142	801	FISHEYE	NOTOOL	S2	M	DY	18.772	820
FISHEYE	NOTOOL	S2	M	MSY	8.695	1208	FISHEYE	NOTOOL	S2	M	DY	20.061	887
FISHEYE	NOTOOL	S2	M	MSY	9.263	595	FISHEYE	NOTOOL	S2	M	DY	15.694	618
FISHEYE	NOTOOL	S2	M	MSY	8.639	518	FISHEYE	NOTOOL	S2	M	DY	15.766	586
FISHEYE	NOTOOL	S2	M	MSY	10.724	1351	FISHEYE	NOTOOL	S2	M	DY	16.556	507
FISHEYE	NOTOOL	S2	M	MSY	9.959	608	FISHEYE	NOTOOL	S2	M	DY	16.724	782
UNDISTORTED	NOTOOL	S2	M	MSY	9.873	471	UNDISTORTED	NOTOOL	S2	M	DY	15.836	1170
UNDISTORTED	NOTOOL	S2	M	MSY	10.431	766	UNDISTORTED	NOTOOL	S2	M	DY	15.045	1871
UNDISTORTED	NOTOOL	S2	M	MSY	11.96	720	UNDISTORTED	NOTOOL	S2	M	DY	13.406	1431
UNDISTORTED	NOTOOL	S2	M	MSY	8.82	695	UNDISTORTED	NOTOOL	S2	M	DY	14.898	1206
UNDISTORTED	NOTOOL	S2	M	MSY	8.826	821	UNDISTORTED	NOTOOL	S2	M	DY	16.72	1191
UNDISTORTED	NOTOOL	S2	M	MSY	9.023	542	UNDISTORTED	NOTOOL	S2	M	DY	14.341	1327
UNDISTORTED	NOTOOL	S2	M	MSY	8.707	1167	UNDISTORTED	NOTOOL	S2	M	DY	14.948	961
UNDISTORTED	NOTOOL	S2	M	MSY	8.931	1176	UNDISTORTED	NOTOOL	S2	M	DY	14.922	547
UNDISTORTED	NOTOOL	S2	M	MSY	8.719	532	UNDISTORTED	NOTOOL	S2	M	DY	13.864	828
UNDISTORTED	NOTOOL	S2	M	MSY	10.624	767	UNDISTORTED	NOTOOL	S2	M	DY	14.225	846
OCULUS	NOTOOL	S2	M	MSY	14.155	1366	OCULUS	NOTOOL	S2	M	DY	18.561	1608
OCULUS	NOTOOL	S2	M	MSY	14.088	1415	OCULUS	NOTOOL	S2	M	DY	15.591	1438
OCULUS	NOTOOL	S2	M	MSY	12.81	1674	OCULUS	NOTOOL	S2	M	DY	16.229	925
OCULUS	NOTOOL	S2	M	MSY	12.928	1005	OCULUS	NOTOOL	S2	M	DY	14.62	1793
OCULUS	NOTOOL	S2	M	MSY	14.467	632	OCULUS	NOTOOL	S2	M	DY	14.125	536
OCULUS	NOTOOL	S2	M	MSY	12.528	1229	OCULUS	NOTOOL	S2	M	DY	12.88	1247
OCULUS	NOTOOL	S2	M	MSY	10.742	1059	OCULUS	NOTOOL	S2	M	DY	13.396	1024
OCULUS	NOTOOL	S2	M	MSY	11.156	1275	OCULUS	NOTOOL	S2	M	DY	14.214	1669
OCULUS	NOTOOL	S2	M	MSY	12.562	716	OCULUS	NOTOOL	S2	M	DY	14.112	1168
OCULUS	NOTOOL	S2	M	MSY	10.515	1021	OCULUS	NOTOOL	S2	M	DY	14.563	884
DIRECT	TOOL	S2	M	MSY	4.909	790	DIRECT	TOOL	S2	M	DY	9.846	290
DIRECT	TOOL	S2	M	MSY	5.482	596	DIRECT	TOOL	S2	M	DY	9.529	502
DIRECT	TOOL	S2	M	MSY	5.117	721	DIRECT	TOOL	S2	M	DY	9.2	537
DIRECT	TOOL	S2	M	MSY	5.322	536	DIRECT	TOOL	S2	M	DY	9.918	459
DIRECT	TOOL	S2	M	MSY	5.234	775	DIRECT	TOOL	S2	M	DY	9.011	335
DIRECT	TOOL	S2	M	MSY	5.165	755	DIRECT	TOOL	S2	M	DY	10.017	289
DIRECT	TOOL	S2	M	MSY	5.059	444	DIRECT	TOOL	S2	M	DY	11.017	626
DIRECT	TOOL	S2	M	MSY	4.976	422	DIRECT	TOOL	S2	M	DY	9.817	355
DIRECT	TOOL	S2	M	MSY	4.819	869	DIRECT	TOOL	S2	M	DY	9.266	388
DIRECT	TOOL	S2	M	MSY	4.72	833	DIRECT	TOOL	S2	M	DY	9.979	380
FISHEYE	TOOL	S2	M	MSY	10.219	1015	FISHEYE	TOOL	S2	M	DY	17.127	634
FISHEYE	TOOL	S2	M	MSY	12.882	269	FISHEYE	TOOL	S2	M	DY	14.244	650
FISHEYE	TOOL	S2	M	MSY	12.171	378	FISHEYE	TOOL	S2	M	DY	14.411	1077
FISHEYE	TOOL	S2	M	MSY	12.321	651	FISHEYE	TOOL	S2	M	DY	14.999	487
FISHEYE	TOOL	S2	M	MSY	12.682	380	FISHEYE	TOOL	S2	M	DY	14.104	443
FISHEYE	TOOL	S2	M	MSY	11.052	964	FISHEYE	TOOL	S2	M	DY	13.408	452
FISHEYE	TOOL	S2	M	MSY	10.318	1265	FISHEYE	TOOL	S2	M	DY	12.668	280
FISHEYE	TOOL	S2	M	MSY	9.775	956	FISHEYE	TOOL	S2	M	DY	13.747	895
FISHEYE	TOOL	S2	M	MSY	10.12	595	FISHEYE	TOOL	S2	M	DY	12.719	487
FISHEYE	TOOL	S2	M	MSY	11.291	1079	FISHEYE	TOOL	S2	M	DY	12.056	553
UNDISTORTED	TOOL	S2	M	MSY	9.625	708	UNDISTORTED	TOOL	S2	M	DY	13.59	289
UNDISTORTED	TOOL	S2	M	MSY	9.806	617	UNDISTORTED	TOOL	S2	M	DY	13.924	821
UNDISTORTED	TOOL	S2	M	MSY	10.188	606	UNDISTORTED	TOOL	S2	M	DY	12.465	1177
UNDISTORTED	TOOL	S2	M	MSY	14.05	792	UNDISTORTED	TOOL	S2	M	DY	13.046	1045
UNDISTORTED	TOOL	S2	M	MSY	12.962	982	UNDISTORTED	TOOL	S2	M	DY	13.863	513
UNDISTORTED	TOOL	S2	M	MSY	11.066	1047	UNDISTORTED	TOOL	S2	M	DY	13.082	1066
UNDISTORTED	TOOL	S2	M	MSY	11.338	915	UNDISTORTED	TOOL	S2	M	DY	14.51	753
UNDISTORTED	TOOL	S2	M	MSY	13.876	632	UNDISTORTED	TOOL	S2	M	DY	14.677	531
UNDISTORTED	TOOL	S2	M	MSY	14.197	797	UNDISTORTED	TOOL	S2	M	DY	13.913	455
UNDISTORTED	TOOL	S2	M	MSY	13.441	831	UNDISTORTED	TOOL	S2	M	DY	12.276	467
OCULUS	TOOL	S2	M	MSY	15.838	1583	OCULUS	TOOL	S2	M	DY	17.829	1262
OCULUS	TOOL	S2	M	MSY	15.659	1489	OCULUS	TOOL	S2	M	DY	13.471	837
OCULUS	TOOL	S2	M	MSY	14.75	1784	OCULUS	TOOL	S2	M	DY	12.605	948
OCULUS	TOOL	S2	M	MSY	14.712	2285	OCULUS	TOOL	S2	M	DY	12.838	1284
OCULUS	TOOL	S2	M	MSY	16.219	1770	OCULUS	TOOL	S2	M	DY	13.409	1615
OCULUS	TOOL	S2	M	MSY	14.89	1762	OCULUS	TOOL	S2	M	DY	13.951	897
OCULUS	TOOL	S2	M	MSY	12.235	1273	OCULUS	TOOL	S2	M	DY	14.173	874
OCULUS	TOOL	S2	M	MSY	12.384	1164	OCULUS	TOOL	S2	M	DY	13.163	1605
OCULUS	TOOL	S2	M	MSY	12.857	1085	OCULUS	TOOL	S2	M	DY	16.395	565
OCULUS	TOOL	S2	M	MSY	13.348	1084	OCULUS	TOOL	S2	M	DY	12.75	768
DIRECT	NOTOOL	S1	M	PM	7.112	169	DIRECT	NOTOOL	S1	F	AMV	6.207	612
DIRECT	NOTOOL	S1	M	PM	6.522	252	DIRECT	NOTOOL	S1	F	AMV	6.624	605
DIRECT	NOTOOL	S1	M	PM	7.77	578	DIRECT	NOTOOL	S1	F	AMV	6.312	221
DIRECT	NOTOOL	S1	M	PM	7.091	137	DIRECT	NOTOOL	S1	F	AMV	6.223	440
DIRECT	NOTOOL	S1	M	PM	6.246	250	DIRECT	NOTOOL	S1	F	AMV	6.062	821
DIRECT	NOTOOL	S1	M	PM	6.301	122	DIRECT	NOTOOL	S1	F	AMV	5.777	595
DIRECT	NOTOOL	S1	M	PM	6.045	352	DIRECT	NOTOOL	S1	F	AMV	5.956	893
DIRECT	NOTOOL	S1	M	PM	6.905	494	DIRECT	NOTOOL	S1	F	AMV	5.825	1064
DIRECT	NOTOOL	S1	M	PM	4.938	245	DIRECT	NOTOOL	S1	F	AMV	6.279	565
DIRECT	NOTOOL	S1	M	PM	5.3	70	DIRECT	NOTOOL	S1	F	AMV	6.128	663
FISHEYE	NOTOOL	S1	M	PM	13.005	865	FISHEYE	NOTOOL	S1	F	AMV	15.248	592
FISHEYE	NOTOOL	S1	M	PM	11.135	680	FISHEYE	NOTOOL	S1	F	AMV	16.256	924
FISHEYE	NOTOOL	S1	M	PM	9.933	698	FISHEYE	NOTOOL	S1	F	AMV	15.908	1277
FISHEYE	NOTOOL	S1	M	PM	10.522	505	FISHEYE	NOTOOL	S1	F	AMV	15.984	912
FISHEYE	NOTOOL	S1	M	PM	9.296	728	FISHEYE	NOTOOL	S1	F	AMV	14.639	954
FISHEYE	NOTOOL	S1	M	PM	9.555	649	FISHEYE	NOTOOL	S1	F	AMV	14.76	993
FISHEYE	NOTOOL	S1	M	PM	9.403	1013	FISHEYE	NOTOOL	S1	F	AMV	12.41	1140
FISHEYE	NOTOOL	S1	M	PM	9.504	937	FISHEYE	NOTOOL	S1	F	AMV	12.61	706
FISHEYE	NOTOOL	S1	M	PM	10.021	904	FISHEYE	NOTOOL	S1	F	AMV	12.965	886
FISHEYE	NOTOOL	S1	M	PM	9.72	403	FISHEYE	NOTOOL	S1	F	AMV	13.472	892
UNDISTORTED	NOTOOL	S1	M	PM	10.21	777	UNDISTORTED	NOTOOL	S1	F	AMV	15.805	1287
UNDISTORTED	NOTOOL	S1	M	PM	10.57	1045	UNDISTORTED	NOTOOL	S1	F	AMV	13.866	1302
UNDISTORTED	NOTOOL	S1	M	PM	10.411	1512	UNDISTORTED	NOTOOL	S1	F	AMV	13	944
UNDISTORTED	NOTOOL	S1	M	PM	10.228	1105	UNDISTORTED	NOTOOL	S1	F	AMV	15.842	644
UNDISTORTED	NOTOOL	S1	M	PM	9.54	1403	UNDISTORTED	NOTOOL	S1	F	AMV	14.149	1049
UNDISTORTED	NOTOOL	S1	M	PM	9.967	1002	UNDISTORTED	NOTOOL	S1	F	AMV	13.041	2259
UNDISTORTED	NOTOOL	S1	M	PM	10.626	719	UNDISTORTED	NOTOOL	S1	F	AMV	12.96	1330
UNDISTORTED	NOTOOL	S1	M	PM	10.253	1054	UNDISTORTED	NOTOOL	S1	F	AMV	12.466	584
UNDISTORTED	NOTOOL	S1	M	PM	10.754	1432	UNDISTORTED	NOTOOL	S1	F	AMV	11.841	820
UNDISTORTED	NOTOOL	S1	M	PM	9.837	954	UNDISTORTED	NOTOOL	S1	F	AMV	11.99	1281
OCULUS	NOTOOL	S1	M	PM	14.567	1205	OCULUS	NOTOOL	S1	F	AMV	16.956	604
OCULUS	NOTOOL	S1	M	PM	11.779	1664	OCULUS	NOTOOL	S1	F	AMV	13.762	834
OCULUS	NOTOOL	S1	M	PM	10.616	1291	OCULUS	NOTOOL	S1	F	AMV	13.119	913
OCULUS	NOTOOL	S1	M	PM	10.549	965	OCULUS	NOTOOL	S1	F	AMV	12.435	1154
OCULUS	NOTOOL	S1	M	PM	11.671	551	OCULUS	NOTOOL	S1	F	AMV	12.504	980
OCULUS	NOTOOL	S1	M	PM	11.363	901	OCULUS	NOTOOL	S1	F	AMV	11.163	642
OCULUS	NOTOOL	S1	M	PM	12.575	530	OCULUS	NOTOOL	S1	F	AMV	10.762	663
OCULUS	NOTOOL	S1	M	PM	11.11	1234	OCULUS	NOTOOL	S1	F	AMV	10.88	855
OCULUS	NOTOOL	S1	M	PM	12.086	986	OCULUS	NOTOOL	S1	F	AMV	9.616	960
OCULUS	NOTOOL	S1	M	PM	11.468	898	OCULUS	NOTOOL	S1	F	AMV	11.623	1179
DIRECT	TOOL	S1	M	PM	6.828	616	DIRECT	TOOL	S1	F	AMV	7.63	692
DIRECT	TOOL	S1	M	PM	6.178	832	DIRECT	TOOL	S1	F	AMV	8.268	451
DIRECT	TOOL	S1	M	PM	5.883	514	DIRECT	TOOL	S1	F	AMV	8.325	372
DIRECT	TOOL	S1	M	PM	6.368	816	DIRECT	TOOL	S1	F	AMV	9.715	440
DIRECT	TOOL	S1	M	PM	5.632	484	DIRECT	TOOL	S1	F	AMV	8.263	304
DIRECT	TOOL	S1	M	PM	5.567	795	DIRECT	TOOL	S1	F	AMV	8.134	250
DIRECT	TOOL	S1	M	PM	5.827	434	DIRECT	TOOL	S1	F	AMV	7.799	335
DIRECT	TOOL	S1	M	PM	5.904	396	DIRECT	TOOL	S1	F	AMV	7.835	196
DIRECT	TOOL	S1	M	PM	6.18	347	DIRECT	TOOL	S1	F	AMV	8.322	498
DIRECT	TOOL	S1	M	PM	6.249	478	DIRECT	TOOL	S1	F	AMV	8.544	381
FISHEYE	TOOL	S1	M	PM	13.233	825	FISHEYE	TOOL	S1	F	AMV	23.589	592
FISHEYE	TOOL	S1	M	PM	13.116	845	FISHEYE	TOOL	S1	F	AMV	18.178	786
FISHEYE	TOOL	S1	M	PM	11.738	937	FISHEYE	TOOL	S1	F	AMV	19.95	443
FISHEYE	TOOL	S1	M	PM	11.416	866	FISHEYE	TOOL	S1	F	AMV	24.458	617
FISHEYE	TOOL	S1	M	PM	12.232	713	FISHEYE	TOOL	S1	F	AMV	19.228	918
FISHEYE	TOOL	S1	M	PM	13.021	964	FISHEYE	TOOL	S1	F	AMV	18.212	586
FISHEYE	TOOL	S1	M	PM	13.389	791	FISHEYE	TOOL	S1	F	AMV	16.438	807
FISHEYE	TOOL	S1	M	PM	12.501	858	FISHEYE	TOOL	S1	F	AMV	16.167	1057
FISHEYE	TOOL	S1	M	PM	12.344	579	FISHEYE	TOOL	S1	F	AMV	15.941	697
FISHEYE	TOOL	S1	M	PM	12.134	794	FISHEYE	TOOL	S1	F	AMV	15.614	811
UNDISTORTED	TOOL	S1	M	PM	12.064	660	UNDISTORTED	TOOL	S1	F	AMV	15.877	678
UNDISTORTED	TOOL	S1	M	PM	12.114	1196	UNDISTORTED	TOOL	S1	F	AMV	13.306	1376
UNDISTORTED	TOOL	S1	M	PM	12.453	1247	UNDISTORTED	TOOL	S1	F	AMV	13.577	1201
UNDISTORTED	TOOL	S1	M	PM	11.906	1644	UNDISTORTED	TOOL	S1	F	AMV	12.954	1001
UNDISTORTED	TOOL	S1	M	PM	12.666	1377	UNDISTORTED	TOOL	S1	F	AMV	13.58	857
UNDISTORTED	TOOL	S1	M	PM	12.132	1315	UNDISTORTED	TOOL	S1	F	AMV	13.055	1118
UNDISTORTED	TOOL	S1	M	PM	11.623	1014	UNDISTORTED	TOOL	S1	F	AMV	12.898	1157
UNDISTORTED	TOOL	S1	M	PM	12.319	1131	UNDISTORTED	TOOL	S1	F	AMV	12.983	1032
UNDISTORTED	TOOL	S1	M	PM	12.667	1360	UNDISTORTED	TOOL	S1	F	AMV	12.143	1042
UNDISTORTED	TOOL	S1	M	PM	12.943	956	UNDISTORTED	TOOL	S1	F	AMV	13.103	1307
OCULUS	TOOL	S1	M	PM	12.695	1480	OCULUS	TOOL	S1	F	AMV	17.477	1814
OCULUS	TOOL	S1	M	PM	11.088	1912	OCULUS	TOOL	S1	F	AMV	16.758	1248
OCULUS	TOOL	S1	M	PM	11.877	1373	OCULUS	TOOL	S1	F	AMV	16.551	1231
OCULUS	TOOL	S1	M	PM	11.669	1668	OCULUS	TOOL	S1	F	AMV	14.985	859
OCULUS	TOOL	S1	M	PM	12.017	1174	OCULUS	TOOL	S1	F	AMV	14.859	1079
OCULUS	TOOL	S1	M	PM	12.991	1896	OCULUS	TOOL	S1	F	AMV	13.408	1360
OCULUS	TOOL	S1	M	PM	12.243	1078	OCULUS	TOOL	S1	F	AMV	13.095	1509
OCULUS	TOOL	S1	M	PM	12.668	907	OCULUS	TOOL	S1	F	AMV	12.914	1719
OCULUS	TOOL	S1	M	PM	12.709	1598	OCULUS	TOOL	S1	F	AMV	12.049	1900
OCULUS	TOOL	S1	M	PM	13.239	1374	OCULUS	TOOL	S1	F	AMV	11.959	1516
DIRECT	NOTOOL	S2	M	PM	5.982	1149	DIRECT	NOTOOL	S2	F	AMV	5.532	534
DIRECT	NOTOOL	S2	M	PM	5.267	584	DIRECT	NOTOOL	S2	F	AMV	4.524	1021
DIRECT	NOTOOL	S2	M	PM	5.137	353	DIRECT	NOTOOL	S2	F	AMV	4.44	573
DIRECT	NOTOOL	S2	M	PM	5.395	218	DIRECT	NOTOOL	S2	F	AMV	4.513	573
DIRECT	NOTOOL	S2	M	PM	5.362	978	DIRECT	NOTOOL	S2	F	AMV	4.345	898
DIRECT	NOTOOL	S2	M	PM	5.615	852	DIRECT	NOTOOL	S2	F	AMV	4.468	782
DIRECT	NOTOOL	S2	M	PM	5.842	459	DIRECT	NOTOOL	S2	F	AMV	4.479	522
DIRECT	NOTOOL	S2	M	PM	5.818	132	DIRECT	NOTOOL	S2	F	AMV	4.47	725
DIRECT	NOTOOL	S2	M	PM	6.155	192	DIRECT	NOTOOL	S2	F	AMV	4.416	629
DIRECT	NOTOOL	S2	M	PM	5.947	139	DIRECT	NOTOOL	S2	F	AMV	4.265	732
FISHEYE	NOTOOL	S2	M	PM	11.251	1000	FISHEYE	NOTOOL	S2	F	AMV	7.51	980
FISHEYE	NOTOOL	S2	M	PM	10.698	807	FISHEYE	NOTOOL	S2	F	AMV	7.697	1266
FISHEYE	NOTOOL	S2	M	PM	10.357	694	FISHEYE	NOTOOL	S2	F	AMV	8.093	657
FISHEYE	NOTOOL	S2	M	PM	10.595	921	FISHEYE	NOTOOL	S2	F	AMV	9.162	854
FISHEYE	NOTOOL	S2	M	PM	11.028	925	FISHEYE	NOTOOL	S2	F	AMV	9.225	1880
FISHEYE	NOTOOL	S2	M	PM	11.454	710	FISHEYE	NOTOOL	S2	F	AMV	7.711	646
FISHEYE	NOTOOL	S2	M	PM	11.251	897	FISHEYE	NOTOOL	S2	F	AMV	7.99	715
FISHEYE	NOTOOL	S2	M	PM	10.863	1113	FISHEYE	NOTOOL	S2	F	AMV	7.423	1424
FISHEYE	NOTOOL	S2	M	PM	11.949	476	FISHEYE	NOTOOL	S2	F	AMV	8.173	1493
FISHEYE	NOTOOL	S2	M	PM	11.071	1156	FISHEYE	NOTOOL	S2	F	AMV	8.561	1143
UNDISTORTED	NOTOOL	S2	M	PM	8.581	1513	UNDISTORTED	NOTOOL	S2	F	AMV	8.032	1094
UNDISTORTED	NOTOOL	S2	M	PM	8.818	1253	UNDISTORTED	NOTOOL	S2	F	AMV	8.801	941
UNDISTORTED	NOTOOL	S2	M	PM	9.061	1124	UNDISTORTED	NOTOOL	S2	F	AMV	7.078	1064
UNDISTORTED	NOTOOL	S2	M	PM	9.201	1059	UNDISTORTED	NOTOOL	S2	F	AMV	8.343	799
UNDISTORTED	NOTOOL	S2	M	PM	10.159	823	UNDISTORTED	NOTOOL	S2	F	AMV	8.077	827
UNDISTORTED	NOTOOL	S2	M	PM	10.332	1329	UNDISTORTED	NOTOOL	S2	F	AMV	8.982	1071
UNDISTORTED	NOTOOL	S2	M	PM	10.012	752	UNDISTORTED	NOTOOL	S2	F	AMV	8.04	782
UNDISTORTED	NOTOOL	S2	M	PM	9.828	2009	UNDISTORTED	NOTOOL	S2	F	AMV	8.139	327
UNDISTORTED	NOTOOL	S2	M	PM	10.395	1164	UNDISTORTED	NOTOOL	S2	F	AMV	8.522	439
UNDISTORTED	NOTOOL	S2	M	PM	10.633	873	UNDISTORTED	NOTOOL	S2	F	AMV	8.372	734
OCULUS	NOTOOL	S2	M	PM	13.779	1377	OCULUS	NOTOOL	S2	F	AMV	10.056	1042
OCULUS	NOTOOL	S2	M	PM	14.18	2187	OCULUS	NOTOOL	S2	F	AMV	10.518	867
OCULUS	NOTOOL	S2	M	PM	11.286	1175	OCULUS	NOTOOL	S2	F	AMV	8.718	1290
OCULUS	NOTOOL	S2	M	PM	11.195	1703	OCULUS	NOTOOL	S2	F	AMV	9.015	1076
OCULUS	NOTOOL	S2	M	PM	11.55	1150	OCULUS	NOTOOL	S2	F	AMV	8.267	654
OCULUS	NOTOOL	S2	M	PM	11.561	1482	OCULUS	NOTOOL	S2	F	AMV	8.391	736
OCULUS	NOTOOL	S2	M	PM	11.365	1271	OCULUS	NOTOOL	S2	F	AMV	7.651	982
OCULUS	NOTOOL	S2	M	PM	11.531	1036	OCULUS	NOTOOL	S2	F	AMV	8.212	1942
OCULUS	NOTOOL	S2	M	PM	11.611	594	OCULUS	NOTOOL	S2	F	AMV	7.95	885
OCULUS	NOTOOL	S2	M	PM	11.371	826	OCULUS	NOTOOL	S2	F	AMV	9.483	1437
DIRECT	TOOL	S2	M	PM	7.513	701	DIRECT	TOOL	S2	F	AMV	5.03	905
DIRECT	TOOL	S2	M	PM	6.673	650	DIRECT	TOOL	S2	F	AMV	5.304	601
DIRECT	TOOL	S2	M	PM	6.697	734	DIRECT	TOOL	S2	F	AMV	5.285	415
DIRECT	TOOL	S2	M	PM	6.698	891	DIRECT	TOOL	S2	F	AMV	5.913	589
DIRECT	TOOL	S2	M	PM	6.28	871	DIRECT	TOOL	S2	F	AMV	5.92	565
DIRECT	TOOL	S2	M	PM	6.421	611	DIRECT	TOOL	S2	F	AMV	4.877	760
DIRECT	TOOL	S2	M	PM	6.807	858	DIRECT	TOOL	S2	F	AMV	6.283	365
DIRECT	TOOL	S2	M	PM	6.778	595	DIRECT	TOOL	S2	F	AMV	5.576	490
DIRECT	TOOL	S2	M	PM	7.19	777	DIRECT	TOOL	S2	F	AMV	5.597	408
DIRECT	TOOL	S2	M	PM	7.079	671	DIRECT	TOOL	S2	F	AMV	5.61	611
FISHEYE	TOOL	S2	M	PM	11.974	1200	FISHEYE	TOOL	S2	F	AMV	9.393	1553
FISHEYE	TOOL	S2	M	PM	13.299	1051	FISHEYE	TOOL	S2	F	AMV	9.26	1732
FISHEYE	TOOL	S2	M	PM	13.043	1055	FISHEYE	TOOL	S2	F	AMV	8.416	1288
FISHEYE	TOOL	S2	M	PM	12.955	1084	FISHEYE	TOOL	S2	F	AMV	9.262	430
FISHEYE	TOOL	S2	M	PM	14.532	1292	FISHEYE	TOOL	S2	F	AMV	9.504	365
FISHEYE	TOOL	S2	M	PM	13.907	1089	FISHEYE	TOOL	S2	F	AMV	9.56	502
FISHEYE	TOOL	S2	M	PM	13.362	1173	FISHEYE	TOOL	S2	F	AMV	9.103	578
FISHEYE	TOOL	S2	M	PM	12.7	1467	FISHEYE	TOOL	S2	F	AMV	9.363	689
FISHEYE	TOOL	S2	M	PM	11.201	1540	FISHEYE	TOOL	S2	F	AMV	9.515	1405
FISHEYE	TOOL	S2	M	PM	12.071	1463	FISHEYE	TOOL	S2	F	AMV	8.977	1354
UNDISTORTED	TOOL	S2	M	PM	11.223	1065	UNDISTORTED	TOOL	S2	F	AMV	10.451	858
UNDISTORTED	TOOL	S2	M	PM	11.783	1749	UNDISTORTED	TOOL	S2	F	AMV	10.543	460
UNDISTORTED	TOOL	S2	M	PM	12.563	1702	UNDISTORTED	TOOL	S2	F	AMV	10.759	592
UNDISTORTED	TOOL	S2	M	PM	12.9	1140	UNDISTORTED	TOOL	S2	F	AMV	10.328	773
UNDISTORTED	TOOL	S2	M	PM	12.641	1320	UNDISTORTED	TOOL	S2	F	AMV	9.47	772
UNDISTORTED	TOOL	S2	M	PM	13.484	2163	UNDISTORTED	TOOL	S2	F	AMV	10.121	533
UNDISTORTED	TOOL	S2	M	PM	13.927	1983	UNDISTORTED	TOOL	S2	F	AMV	10.466	694
UNDISTORTED	TOOL	S2	M	PM	13.445	1732	UNDISTORTED	TOOL	S2	F	AMV	10.843	466
UNDISTORTED	TOOL	S2	M	PM	15.044	1188	UNDISTORTED	TOOL	S2	F	AMV	10.088	975
UNDISTORTED	TOOL	S2	M	PM	13.943	1904	UNDISTORTED	TOOL	S2	F	AMV	12.355	733
OCULUS	TOOL	S2	M	PM	12.168	1315	OCULUS	TOOL	S2	F	AMV	10.305	2071
OCULUS	TOOL	S2	M	PM	12.383	1558	OCULUS	TOOL	S2	F	AMV	10.398	1867
OCULUS	TOOL	S2	M	PM	12.469	1572	OCULUS	TOOL	S2	F	AMV	9.967	1545
OCULUS	TOOL	S2	M	PM	12.404	1467	OCULUS	TOOL	S2	F	AMV	9.149	1587
OCULUS	TOOL	S2	M	PM	12.828	1600	OCULUS	TOOL	S2	F	AMV	9.873	1948
OCULUS	TOOL	S2	M	PM	14.565	1516	OCULUS	TOOL	S2	F	AMV	9.32	1735
OCULUS	TOOL	S2	M	PM	13.354	1072	OCULUS	TOOL	S2	F	AMV	8.943	1329
OCULUS	TOOL	S2	M	PM	15.544	2072	OCULUS	TOOL	S2	F	AMV	8.684	1932
OCULUS	TOOL	S2	M	PM	15.056	848	OCULUS	TOOL	S2	F	AMV	9.525	1118
OCULUS	TOOL	S2	M	PM	14.978	1217	OCULUS	TOOL	S2	F	AMV	9.243	2138
DIRECT	NOTOOL	S1	F	GA	7.938	1058	DIRECT	NOTOOL	S1	M	KK	14.705	2954
DIRECT	NOTOOL	S1	F	GA	8.793	1683	DIRECT	NOTOOL	S1	M	KK	12.871	125
DIRECT	NOTOOL	S1	F	GA	8.391	1476	DIRECT	NOTOOL	S1	M	KK	14.244	271
DIRECT	NOTOOL	S1	F	GA	8.305	887	DIRECT	NOTOOL	S1	M	KK	12.896	247
DIRECT	NOTOOL	S1	F	GA	8.689	768	DIRECT	NOTOOL	S1	M	KK	12.991	221
DIRECT	NOTOOL	S1	F	GA	7.604	874	DIRECT	NOTOOL	S1	M	KK	11.144	175
DIRECT	NOTOOL	S1	F	GA	8.639	939	DIRECT	NOTOOL	S1	M	KK	11.468	340
DIRECT	NOTOOL	S1	F	GA	8.151	1003	DIRECT	NOTOOL	S1	M	KK	10.887	308
DIRECT	NOTOOL	S1	F	GA	8.562	911	DIRECT	NOTOOL	S1	M	KK	9.057	240
DIRECT	NOTOOL	S1	F	GA	8.679	652	DIRECT	NOTOOL	S1	M	KK	7.56	259
FISHEYE	NOTOOL	S1	F	GA	12.885	626	FISHEYE	NOTOOL	S1	M	KK	37.508	1580
FISHEYE	NOTOOL	S1	F	GA	12.796	1216	FISHEYE	NOTOOL	S1	M	KK	21.816	1462
FISHEYE	NOTOOL	S1	F	GA	15.465	1260	FISHEYE	NOTOOL	S1	M	KK	19.151	2075
FISHEYE	NOTOOL	S1	F	GA	14.352	1264	FISHEYE	NOTOOL	S1	M	KK	17.255	1749
FISHEYE	NOTOOL	S1	F	GA	13.374	1125	FISHEYE	NOTOOL	S1	M	KK	18.854	852
FISHEYE	NOTOOL	S1	F	GA	13.048	1353	FISHEYE	NOTOOL	S1	M	KK	17.862	680
FISHEYE	NOTOOL	S1	F	GA	13.009	1209	FISHEYE	NOTOOL	S1	M	KK	16.896	1185
FISHEYE	NOTOOL	S1	F	GA	12.294	1305	FISHEYE	NOTOOL	S1	M	KK	19.129	1159
FISHEYE	NOTOOL	S1	F	GA	17.026	1675	FISHEYE	NOTOOL	S1	M	KK	17.107	725
FISHEYE	NOTOOL	S1	F	GA	16.245	1636	FISHEYE	NOTOOL	S1	M	KK	12.491	1491
UNDISTORTED	NOTOOL	S1	F	GA	17.808	603	UNDISTORTED	NOTOOL	S1	M	KK	15.423	1982
UNDISTORTED	NOTOOL	S1	F	GA	18.144	1690	UNDISTORTED	NOTOOL	S1	M	KK	17.403	1373
UNDISTORTED	NOTOOL	S1	F	GA	15.77	1112	UNDISTORTED	NOTOOL	S1	M	KK	14.701	1285
UNDISTORTED	NOTOOL	S1	F	GA	13.866	809	UNDISTORTED	NOTOOL	S1	M	KK	13.843	1903
UNDISTORTED	NOTOOL	S1	F	GA	13.623	1052	UNDISTORTED	NOTOOL	S1	M	KK	14.814	1712
UNDISTORTED	NOTOOL	S1	F	GA	14.551	1244	UNDISTORTED	NOTOOL	S1	M	KK	15.047	947
UNDISTORTED	NOTOOL	S1	F	GA	14.312	744	UNDISTORTED	NOTOOL	S1	M	KK	18.839	762
UNDISTORTED	NOTOOL	S1	F	GA	13.252	1618	UNDISTORTED	NOTOOL	S1	M	KK	14.78	947
UNDISTORTED	NOTOOL	S1	F	GA	13.167	1210	UNDISTORTED	NOTOOL	S1	M	KK	15.683	1265
UNDISTORTED	NOTOOL	S1	F	GA	12.547	1468	UNDISTORTED	NOTOOL	S1	M	KK	13.39	1249
OCULUS	NOTOOL	S1	F	GA	17.718	1000	OCULUS	NOTOOL	S1	M	KK	18.615	979
OCULUS	NOTOOL	S1	F	GA	15.821	1119	OCULUS	NOTOOL	S1	M	KK	14.502	1363
OCULUS	NOTOOL	S1	F	GA	14.933	2528	OCULUS	NOTOOL	S1	M	KK	12.886	2213
OCULUS	NOTOOL	S1	F	GA	15.266	1746	OCULUS	NOTOOL	S1	M	KK	11.106	2337
OCULUS	NOTOOL	S1	F	GA	13.297	2467	OCULUS	NOTOOL	S1	M	KK	10.421	2333
OCULUS	NOTOOL	S1	F	GA	13.864	2225	OCULUS	NOTOOL	S1	M	KK	11.371	2027
OCULUS	NOTOOL	S1	F	GA	14.183	2449	OCULUS	NOTOOL	S1	M	KK	11.58	1234
OCULUS	NOTOOL	S1	F	GA	13.948	1656	OCULUS	NOTOOL	S1	M	KK	10.684	2033
OCULUS	NOTOOL	S1	F	GA	15.202	1995	OCULUS	NOTOOL	S1	M	KK	12.55	2137
OCULUS	NOTOOL	S1	F	GA	15.101	1867	OCULUS	NOTOOL	S1	M	KK	9.896	1768
DIRECT	TOOL	S1	F	GA	10.118	734	DIRECT	TOOL	S1	M	KK	14.28	302
DIRECT	TOOL	S1	F	GA	9.437	795	DIRECT	TOOL	S1	M	KK	12.658	474
DIRECT	TOOL	S1	F	GA	9.849	884	DIRECT	TOOL	S1	M	KK	11.959	698
DIRECT	TOOL	S1	F	GA	10.269	713	DIRECT	TOOL	S1	M	KK	12.476	489
DIRECT	TOOL	S1	F	GA	10.014	878	DIRECT	TOOL	S1	M	KK	11.278	425
DIRECT	TOOL	S1	F	GA	9.211	550	DIRECT	TOOL	S1	M	KK	13.07	563
DIRECT	TOOL	S1	F	GA	9.017	1223	DIRECT	TOOL	S1	M	KK	12.881	423
DIRECT	TOOL	S1	F	GA	9.505	817	DIRECT	TOOL	S1	M	KK	11.432	498
DIRECT	TOOL	S1	F	GA	9.984	765	DIRECT	TOOL	S1	M	KK	10.64	639
DIRECT	TOOL	S1	F	GA	8.754	556	DIRECT	TOOL	S1	M	KK	10.439	730
FISHEYE	TOOL	S1	F	GA	16.314	1378	FISHEYE	TOOL	S1	M	KK	28.443	1163
FISHEYE	TOOL	S1	F	GA	16.191	2022	FISHEYE	TOOL	S1	M	KK	23.06	1196
FISHEYE	TOOL	S1	F	GA	16.297	1897	FISHEYE	TOOL	S1	M	KK	19.964	797
FISHEYE	TOOL	S1	F	GA	15.011	2591	FISHEYE	TOOL	S1	M	KK	16.96	664
FISHEYE	TOOL	S1	F	GA	14.352	2049	FISHEYE	TOOL	S1	M	KK	17.438	973
FISHEYE	TOOL	S1	F	GA	15.477	1940	FISHEYE	TOOL	S1	M	KK	15.696	1006
FISHEYE	TOOL	S1	F	GA	15.197	2570	FISHEYE	TOOL	S1	M	KK	18.688	739
FISHEYE	TOOL	S1	F	GA	14.555	2719	FISHEYE	TOOL	S1	M	KK	17.241	908
FISHEYE	TOOL	S1	F	GA	14.75	3182	FISHEYE	TOOL	S1	M	KK	16.326	332
FISHEYE	TOOL	S1	F	GA	15.538	2766	FISHEYE	TOOL	S1	M	KK	16.051	553
UNDISTORTED	TOOL	S1	F	GA	16.905	838	UNDISTORTED	TOOL	S1	M	KK	21.149	1204
UNDISTORTED	TOOL	S1	F	GA	16.921	2104	UNDISTORTED	TOOL	S1	M	KK	22.866	1582
UNDISTORTED	TOOL	S1	F	GA	16.56	2020	UNDISTORTED	TOOL	S1	M	KK	18.959	1078
UNDISTORTED	TOOL	S1	F	GA	14.234	1740	UNDISTORTED	TOOL	S1	M	KK	11.564	1857
UNDISTORTED	TOOL	S1	F	GA	13.574	1307	UNDISTORTED	TOOL	S1	M	KK	12.876	1307
UNDISTORTED	TOOL	S1	F	GA	14.356	1576	UNDISTORTED	TOOL	S1	M	KK	13.936	1241
UNDISTORTED	TOOL	S1	F	GA	15.338	1974	UNDISTORTED	TOOL	S1	M	KK	15.319	1369
UNDISTORTED	TOOL	S1	F	GA	15.298	1196	UNDISTORTED	TOOL	S1	M	KK	16.559	1114
UNDISTORTED	TOOL	S1	F	GA	14.258	1753	UNDISTORTED	TOOL	S1	M	KK	15.11	1040
UNDISTORTED	TOOL	S1	F	GA	14.747	1900	UNDISTORTED	TOOL	S1	M	KK	14.724	829
OCULUS	TOOL	S1	F	GA	19.66	2607	OCULUS	TOOL	S1	M	KK	19.972	1282
OCULUS	TOOL	S1	F	GA	20.004	2220	OCULUS	TOOL	S1	M	KK	17.94	698
OCULUS	TOOL	S1	F	GA	17.596	2516	OCULUS	TOOL	S1	M	KK	20.116	710
OCULUS	TOOL	S1	F	GA	18.019	2227	OCULUS	TOOL	S1	M	KK	19.592	1275
OCULUS	TOOL	S1	F	GA	18.194	2967	OCULUS	TOOL	S1	M	KK	17.181	1672
OCULUS	TOOL	S1	F	GA	17.472	2502	OCULUS	TOOL	S1	M	KK	18.529	978
OCULUS	TOOL	S1	F	GA	16.87	3081	OCULUS	TOOL	S1	M	KK	14.527	880
OCULUS	TOOL	S1	F	GA	17.564	2737	OCULUS	TOOL	S1	M	KK	16.628	1257
OCULUS	TOOL	S1	F	GA	17.281	2239	OCULUS	TOOL	S1	M	KK	15.081	811
OCULUS	TOOL	S1	F	GA	17.773	2653	OCULUS	TOOL	S1	M	KK	16.876	1694
DIRECT	NOTOOL	S2	F	GA	7.572	467	DIRECT	NOTOOL	S2	M	KK	5.938	291
DIRECT	NOTOOL	S2	F	GA	8.328	477	DIRECT	NOTOOL	S2	M	KK	5.633	474
DIRECT	NOTOOL	S2	F	GA	8.354	675	DIRECT	NOTOOL	S2	M	KK	6.504	306
DIRECT	NOTOOL	S2	F	GA	7.816	652	DIRECT	NOTOOL	S2	M	KK	6.351	304
DIRECT	NOTOOL	S2	F	GA	7.892	705	DIRECT	NOTOOL	S2	M	KK	6.088	409
DIRECT	NOTOOL	S2	F	GA	7.659	610	DIRECT	NOTOOL	S2	M	KK	7.074	140
DIRECT	NOTOOL	S2	F	GA	7.662	242	DIRECT	NOTOOL	S2	M	KK	6.827	313
DIRECT	NOTOOL	S2	F	GA	7.451	493	DIRECT	NOTOOL	S2	M	KK	6.379	473
DIRECT	NOTOOL	S2	F	GA	8.197	256	DIRECT	NOTOOL	S2	M	KK	6.564	283
DIRECT	NOTOOL	S2	F	GA	7.383	370	DIRECT	NOTOOL	S2	M	KK	7.077	387
FISHEYE	NOTOOL	S2	F	GA	12.967	585	FISHEYE	NOTOOL	S2	M	KK	12.438	1102
FISHEYE	NOTOOL	S2	F	GA	13.033	1375	FISHEYE	NOTOOL	S2	M	KK	11.316	1077
FISHEYE	NOTOOL	S2	F	GA	12.707	1524	FISHEYE	NOTOOL	S2	M	KK	12.073	1183
FISHEYE	NOTOOL	S2	F	GA	11.547	1129	FISHEYE	NOTOOL	S2	M	KK	12.062	1101
FISHEYE	NOTOOL	S2	F	GA	12.039	1325	FISHEYE	NOTOOL	S2	M	KK	11.631	1446
FISHEYE	NOTOOL	S2	F	GA	10.982	1573	FISHEYE	NOTOOL	S2	M	KK	10.538	1487
FISHEYE	NOTOOL	S2	F	GA	12.767	1713	FISHEYE	NOTOOL	S2	M	KK	11.202	1106
FISHEYE	NOTOOL	S2	F	GA	11.139	1428	FISHEYE	NOTOOL	S2	M	KK	9.535	680
FISHEYE	NOTOOL	S2	F	GA	11.656	1430	FISHEYE	NOTOOL	S2	M	KK	10.373	1049
FISHEYE	NOTOOL	S2	F	GA	11.53	1181	FISHEYE	NOTOOL	S2	M	KK	12.069	1357
UNDISTORTED	NOTOOL	S2	F	GA	12.058	977	UNDISTORTED	NOTOOL	S2	M	KK	11.34	847
UNDISTORTED	NOTOOL	S2	F	GA	12.45	1677	UNDISTORTED	NOTOOL	S2	M	KK	13.792	1248
UNDISTORTED	NOTOOL	S2	F	GA	12.912	1260	UNDISTORTED	NOTOOL	S2	M	KK	12.956	1185
UNDISTORTED	NOTOOL	S2	F	GA	13.31	1718	UNDISTORTED	NOTOOL	S2	M	KK	13.143	1335
UNDISTORTED	NOTOOL	S2	F	GA	12.298	1914	UNDISTORTED	NOTOOL	S2	M	KK	12.864	845
UNDISTORTED	NOTOOL	S2	F	GA	10.962	968	UNDISTORTED	NOTOOL	S2	M	KK	12.212	847
UNDISTORTED	NOTOOL	S2	F	GA	11.493	1260	UNDISTORTED	NOTOOL	S2	M	KK	11.818	1206
UNDISTORTED	NOTOOL	S2	F	GA	11.95	1990	UNDISTORTED	NOTOOL	S2	M	KK	12.312	812
UNDISTORTED	NOTOOL	S2	F	GA	11.25	2051	UNDISTORTED	NOTOOL	S2	M	KK	12.341	1398
UNDISTORTED	NOTOOL	S2	F	GA	11.777	1650	UNDISTORTED	NOTOOL	S2	M	KK	11.855	678
OCULUS	NOTOOL	S2	F	GA	12.54	1462	OCULUS	NOTOOL	S2	M	KK	12.473	1341
OCULUS	NOTOOL	S2	F	GA	13.297	1292	OCULUS	NOTOOL	S2	M	KK	11.6	654
OCULUS	NOTOOL	S2	F	GA	13.642	1593	OCULUS	NOTOOL	S2	M	KK	10.036	1835
OCULUS	NOTOOL	S2	F	GA	12.511	1046	OCULUS	NOTOOL	S2	M	KK	11.49	1882
OCULUS	NOTOOL	S2	F	GA	11.791	1566	OCULUS	NOTOOL	S2	M	KK	10.879	1226
OCULUS	NOTOOL	S2	F	GA	12.501	607	OCULUS	NOTOOL	S2	M	KK	11.379	1641
OCULUS	NOTOOL	S2	F	GA	12.029	1571	OCULUS	NOTOOL	S2	M	KK	10.874	1759
OCULUS	NOTOOL	S2	F	GA	11.882	1461	OCULUS	NOTOOL	S2	M	KK	10.459	2034
OCULUS	NOTOOL	S2	F	GA	12.305	1744	OCULUS	NOTOOL	S2	M	KK	9.086	1692
OCULUS	NOTOOL	S2	F	GA	13.435	992	OCULUS	NOTOOL	S2	M	KK	9.463	1886
DIRECT	TOOL	S2	F	GA	10.498	560	DIRECT	TOOL	S2	M	KK	9.991	459
DIRECT	TOOL	S2	F	GA	8.7	670	DIRECT	TOOL	S2	M	KK	8.315	276
DIRECT	TOOL	S2	F	GA	10.509	587	DIRECT	TOOL	S2	M	KK	8.553	162
DIRECT	TOOL	S2	F	GA	9.453	881	DIRECT	TOOL	S2	M	KK	7.432	167
DIRECT	TOOL	S2	F	GA	8.643	297	DIRECT	TOOL	S2	M	KK	7.73	221
DIRECT	TOOL	S2	F	GA	8.91	652	DIRECT	TOOL	S2	M	KK	7.835	260
DIRECT	TOOL	S2	F	GA	9.292	421	DIRECT	TOOL	S2	M	KK	7.749	2368
DIRECT	TOOL	S2	F	GA	9.005	497	DIRECT	TOOL	S2	M	KK	7.72	527
DIRECT	TOOL	S2	F	GA	8.55	392	DIRECT	TOOL	S2	M	KK	7.249	401
DIRECT	TOOL	S2	F	GA	8.497	814	DIRECT	TOOL	S2	M	KK	7.65	102
FISHEYE	TOOL	S2	F	GA	15.559	1247	FISHEYE	TOOL	S2	M	KK	14.961	1148
FISHEYE	TOOL	S2	F	GA	14.862	1347	FISHEYE	TOOL	S2	M	KK	12.163	1011
FISHEYE	TOOL	S2	F	GA	12.843	1830	FISHEYE	TOOL	S2	M	KK	13.113	1480
FISHEYE	TOOL	S2	F	GA	12.854	986	FISHEYE	TOOL	S2	M	KK	13.21	1255
FISHEYE	TOOL	S2	F	GA	13.688	842	FISHEYE	TOOL	S2	M	KK	14.083	346
FISHEYE	TOOL	S2	F	GA	16.213	1131	FISHEYE	TOOL	S2	M	KK	13.711	1182
FISHEYE	TOOL	S2	F	GA	13.958	1285	FISHEYE	TOOL	S2	M	KK	12.866	760
FISHEYE	TOOL	S2	F	GA	14.7	1495	FISHEYE	TOOL	S2	M	KK	12.277	823
FISHEYE	TOOL	S2	F	GA	15.163	1667	FISHEYE	TOOL	S2	M	KK	13.609	1123
FISHEYE	TOOL	S2	F	GA	15.327	1889	FISHEYE	TOOL	S2	M	KK	12.725	657
UNDISTORTED	TOOL	S2	F	GA	11.521	967	UNDISTORTED	TOOL	S2	M	KK	19.842	1125
UNDISTORTED	TOOL	S2	F	GA	12.486	1483	UNDISTORTED	TOOL	S2	M	KK	16.617	1403
UNDISTORTED	TOOL	S2	F	GA	13.7	1482	UNDISTORTED	TOOL	S2	M	KK	15.935	945
UNDISTORTED	TOOL	S2	F	GA	13.353	1969	UNDISTORTED	TOOL	S2	M	KK	16.14	939
UNDISTORTED	TOOL	S2	F	GA	16.801	1327	UNDISTORTED	TOOL	S2	M	KK	15.925	1228
UNDISTORTED	TOOL	S2	F	GA	12.434	1235	UNDISTORTED	TOOL	S2	M	KK	17.071	577
UNDISTORTED	TOOL	S2	F	GA	12.554	1211	UNDISTORTED	TOOL	S2	M	KK	14.102	1403
UNDISTORTED	TOOL	S2	F	GA	13.322	1648	UNDISTORTED	TOOL	S2	M	KK	12.806	638
UNDISTORTED	TOOL	S2	F	GA	13.616	885	UNDISTORTED	TOOL	S2	M	KK	17.477	1265
UNDISTORTED	TOOL	S2	F	GA	13.121	1501	UNDISTORTED	TOOL	S2	M	KK	13.387	1072
OCULUS	TOOL	S2	F	GA	17.225	736	OCULUS	TOOL	S2	M	KK	19.387	685
OCULUS	TOOL	S2	F	GA	15.459	1149	OCULUS	TOOL	S2	M	KK	20.029	978
OCULUS	TOOL	S2	F	GA	14.999	1475	OCULUS	TOOL	S2	M	KK	17.86	978
OCULUS	TOOL	S2	F	GA	17.26	1685	OCULUS	TOOL	S2	M	KK	20.142	428
OCULUS	TOOL	S2	F	GA	15.699	1493	OCULUS	TOOL	S2	M	KK	17.496	701
OCULUS	TOOL	S2	F	GA	16.13	1545	OCULUS	TOOL	S2	M	KK	16.335	342
OCULUS	TOOL	S2	F	GA	16.075	1725	OCULUS	TOOL	S2	M	KK	14.731	686
OCULUS	TOOL	S2	F	GA	16.455	2536	OCULUS	TOOL	S2	M	KK	14.156	810
OCULUS	TOOL	S2	F	GA	15.823	1653	OCULUS	TOOL	S2	M	KK	16.997	752
OCULUS	TOOL	S2	F	GA	17.601	1112	OCULUS	TOOL	S2	M	KK	18.235	1302
DIRECT	NOTOOL	S1	F	IBB	4.137	729	DIRECT	NOTOOL	S1	F	IG	8.102	670
DIRECT	NOTOOL	S1	F	IBB	3.95	493	DIRECT	NOTOOL	S1	F	IG	9.225	436
DIRECT	NOTOOL	S1	F	IBB	4.125	243	DIRECT	NOTOOL	S1	F	IG	9.504	325
DIRECT	NOTOOL	S1	F	IBB	4.179	386	DIRECT	NOTOOL	S1	F	IG	10.097	540
DIRECT	NOTOOL	S1	F	IBB	4.134	700	DIRECT	NOTOOL	S1	F	IG	8.159	623
DIRECT	NOTOOL	S1	F	IBB	3.923	540	DIRECT	NOTOOL	S1	F	IG	7.956	618
DIRECT	NOTOOL	S1	F	IBB	3.875	157	DIRECT	NOTOOL	S1	F	IG	7.591	449
DIRECT	NOTOOL	S1	F	IBB	3.917	619	DIRECT	NOTOOL	S1	F	IG	9.184	344
DIRECT	NOTOOL	S1	F	IBB	4.083	304	DIRECT	NOTOOL	S1	F	IG	9.747	267
DIRECT	NOTOOL	S1	F	IBB	5.226	280	DIRECT	NOTOOL	S1	F	IG	8.18	392
FISHEYE	NOTOOL	S1	F	IBB	7.92	1741	FISHEYE	NOTOOL	S1	F	IG	41.429	1092
FISHEYE	NOTOOL	S1	F	IBB	6.571	1018	FISHEYE	NOTOOL	S1	F	IG	18.356	878
FISHEYE	NOTOOL	S1	F	IBB	6.375	1232	FISHEYE	NOTOOL	S1	F	IG	24.875	1139
FISHEYE	NOTOOL	S1	F	IBB	7.547	1177	FISHEYE	NOTOOL	S1	F	IG	21.774	1360
FISHEYE	NOTOOL	S1	F	IBB	6.996	1890	FISHEYE	NOTOOL	S1	F	IG	18.933	913
FISHEYE	NOTOOL	S1	F	IBB	6.547	1293	FISHEYE	NOTOOL	S1	F	IG	20.152	932
FISHEYE	NOTOOL	S1	F	IBB	6.411	1710	FISHEYE	NOTOOL	S1	F	IG	17.943	1451
FISHEYE	NOTOOL	S1	F	IBB	6.478	1387	FISHEYE	NOTOOL	S1	F	IG	20.302	1262
FISHEYE	NOTOOL	S1	F	IBB	6.605	1449	FISHEYE	NOTOOL	S1	F	IG	22.577	1470
FISHEYE	NOTOOL	S1	F	IBB	6.713	1841	FISHEYE	NOTOOL	S1	F	IG	15.724	1616
UNDISTORTED	NOTOOL	S1	F	IBB	8.888	1121	UNDISTORTED	NOTOOL	S1	F	IG	19.167	1197
UNDISTORTED	NOTOOL	S1	F	IBB	10.099	1276	UNDISTORTED	NOTOOL	S1	F	IG	18.276	1320
UNDISTORTED	NOTOOL	S1	F	IBB	8.786	1046	UNDISTORTED	NOTOOL	S1	F	IG	15.62	1726
UNDISTORTED	NOTOOL	S1	F	IBB	7.443	1043	UNDISTORTED	NOTOOL	S1	F	IG	17.813	1102
UNDISTORTED	NOTOOL	S1	F	IBB	7.229	802	UNDISTORTED	NOTOOL	S1	F	IG	18.024	1289
UNDISTORTED	NOTOOL	S1	F	IBB	6.796	1040	UNDISTORTED	NOTOOL	S1	F	IG	19.753	1541
UNDISTORTED	NOTOOL	S1	F	IBB	7.913	1886	UNDISTORTED	NOTOOL	S1	F	IG	17.922	1532
UNDISTORTED	NOTOOL	S1	F	IBB	6.081	1804	UNDISTORTED	NOTOOL	S1	F	IG	16.51	1118
UNDISTORTED	NOTOOL	S1	F	IBB	7.444	1042	UNDISTORTED	NOTOOL	S1	F	IG	20.038	1189
UNDISTORTED	NOTOOL	S1	F	IBB	6.994	1031	UNDISTORTED	NOTOOL	S1	F	IG	20.266	1253
OCULUS	NOTOOL	S1	F	IBB	9.896	1569	OCULUS	NOTOOL	S1	F	IG	18.392	1043
OCULUS	NOTOOL	S1	F	IBB	8.284	1066	OCULUS	NOTOOL	S1	F	IG	15.472	517
OCULUS	NOTOOL	S1	F	IBB	8.328	1429	OCULUS	NOTOOL	S1	F	IG	15.05	412
OCULUS	NOTOOL	S1	F	IBB	8.168	1888	OCULUS	NOTOOL	S1	F	IG	14.946	761
OCULUS	NOTOOL	S1	F	IBB	8.194	1995	OCULUS	NOTOOL	S1	F	IG	15.212	462
OCULUS	NOTOOL	S1	F	IBB	11.351	1716	OCULUS	NOTOOL	S1	F	IG	15.527	852
OCULUS	NOTOOL	S1	F	IBB	6.893	2141	OCULUS	NOTOOL	S1	F	IG	16.913	558
OCULUS	NOTOOL	S1	F	IBB	6.611	2658	OCULUS	NOTOOL	S1	F	IG	15.7	612
OCULUS	NOTOOL	S1	F	IBB	7.438	2078	OCULUS	NOTOOL	S1	F	IG	19.815	593
OCULUS	NOTOOL	S1	F	IBB	7.01	1586	OCULUS	NOTOOL	S1	F	IG	16.666	846
DIRECT	TOOL	S1	F	IBB	4.43	394	DIRECT	TOOL	S1	F	IG	10.725	579
DIRECT	TOOL	S1	F	IBB	4.139	405	DIRECT	TOOL	S1	F	IG	11.093	211
DIRECT	TOOL	S1	F	IBB	4.248	493	DIRECT	TOOL	S1	F	IG	8.775	206
DIRECT	TOOL	S1	F	IBB	4.2	608	DIRECT	TOOL	S1	F	IG	9.003	858
DIRECT	TOOL	S1	F	IBB	4.269	673	DIRECT	TOOL	S1	F	IG	8.086	261
DIRECT	TOOL	S1	F	IBB	3.926	699	DIRECT	TOOL	S1	F	IG	9.294	361
DIRECT	TOOL	S1	F	IBB	4.148	527	DIRECT	TOOL	S1	F	IG	7.528	354
DIRECT	TOOL	S1	F	IBB	3.909	697	DIRECT	TOOL	S1	F	IG	9.064	276
DIRECT	TOOL	S1	F	IBB	4.037	854	DIRECT	TOOL	S1	F	IG	8.166	319
DIRECT	TOOL	S1	F	IBB	3.854	775	DIRECT	TOOL	S1	F	IG	8.201	618
FISHEYE	TOOL	S1	F	IBB	8.224	1880	FISHEYE	TOOL	S1	F	IG	27.423	1027
FISHEYE	TOOL	S1	F	IBB	7.531	1448	FISHEYE	TOOL	S1	F	IG	24.159	1224
FISHEYE	TOOL	S1	F	IBB	7.878	1620	FISHEYE	TOOL	S1	F	IG	23.461	1342
FISHEYE	TOOL	S1	F	IBB	7.294	2499	FISHEYE	TOOL	S1	F	IG	22.328	1393
FISHEYE	TOOL	S1	F	IBB	6.811	1704	FISHEYE	TOOL	S1	F	IG	22.107	727
FISHEYE	TOOL	S1	F	IBB	6.833	1760	FISHEYE	TOOL	S1	F	IG	23.655	1719
FISHEYE	TOOL	S1	F	IBB	6.504	1849	FISHEYE	TOOL	S1	F	IG	16.701	1004
FISHEYE	TOOL	S1	F	IBB	6.307	1988	FISHEYE	TOOL	S1	F	IG	19.127	654
FISHEYE	TOOL	S1	F	IBB	6.613	846	FISHEYE	TOOL	S1	F	IG	17.624	671
FISHEYE	TOOL	S1	F	IBB	6.849	1102	FISHEYE	TOOL	S1	F	IG	19.854	856
UNDISTORTED	TOOL	S1	F	IBB	7.587	1529	UNDISTORTED	TOOL	S1	F	IG	22.274	857
UNDISTORTED	TOOL	S1	F	IBB	8.008	1376	UNDISTORTED	TOOL	S1	F	IG	20.461	863
UNDISTORTED	TOOL	S1	F	IBB	7.958	1428	UNDISTORTED	TOOL	S1	F	IG	20.412	485
UNDISTORTED	TOOL	S1	F	IBB	8.105	1211	UNDISTORTED	TOOL	S1	F	IG	20.34	581
UNDISTORTED	TOOL	S1	F	IBB	7.584	1702	UNDISTORTED	TOOL	S1	F	IG	20.037	836
UNDISTORTED	TOOL	S1	F	IBB	7.769	1443	UNDISTORTED	TOOL	S1	F	IG	18.04	1468
UNDISTORTED	TOOL	S1	F	IBB	7.297	1527	UNDISTORTED	TOOL	S1	F	IG	17.135	1462
UNDISTORTED	TOOL	S1	F	IBB	7.832	1723	UNDISTORTED	TOOL	S1	F	IG	17.967	1302
UNDISTORTED	TOOL	S1	F	IBB	7.668	1422	UNDISTORTED	TOOL	S1	F	IG	21.468	875
UNDISTORTED	TOOL	S1	F	IBB	7.981	1927	UNDISTORTED	TOOL	S1	F	IG	18.222	1756
OCULUS	TOOL	S1	F	IBB	9.254	2307	OCULUS	TOOL	S1	F	IG	20.836	913
OCULUS	TOOL	S1	F	IBB	7.787	3243	OCULUS	TOOL	S1	F	IG	19.171	400
OCULUS	TOOL	S1	F	IBB	7.914	2190	OCULUS	TOOL	S1	F	IG	23.176	711
OCULUS	TOOL	S1	F	IBB	7.249	2043	OCULUS	TOOL	S1	F	IG	22.325	955
OCULUS	TOOL	S1	F	IBB	7.156	2212	OCULUS	TOOL	S1	F	IG	21.41	1303
OCULUS	TOOL	S1	F	IBB	6.887	2499	OCULUS	TOOL	S1	F	IG	19.595	557
OCULUS	TOOL	S1	F	IBB	6.76	2816	OCULUS	TOOL	S1	F	IG	15.408	812
OCULUS	TOOL	S1	F	IBB	6.994	2696	OCULUS	TOOL	S1	F	IG	18.255	421
OCULUS	TOOL	S1	F	IBB	6.517	1666	OCULUS	TOOL	S1	F	IG	20.911	752
OCULUS	TOOL	S1	F	IBB	6.62	2034	OCULUS	TOOL	S1	F	IG	22.54	446
DIRECT	NOTOOL	S2	F	IBB	4.51	1033	DIRECT	NOTOOL	S2	F	IG	10.894	420
DIRECT	NOTOOL	S2	F	IBB	4.294	631	DIRECT	NOTOOL	S2	F	IG	9.992	447
DIRECT	NOTOOL	S2	F	IBB	4.136	836	DIRECT	NOTOOL	S2	F	IG	10.038	425
DIRECT	NOTOOL	S2	F	IBB	4.016	822	DIRECT	NOTOOL	S2	F	IG	9.741	780
DIRECT	NOTOOL	S2	F	IBB	4.208	805	DIRECT	NOTOOL	S2	F	IG	8.576	481
DIRECT	NOTOOL	S2	F	IBB	3.88	771	DIRECT	NOTOOL	S2	F	IG	8.766	748
DIRECT	NOTOOL	S2	F	IBB	4.037	762	DIRECT	NOTOOL	S2	F	IG	9.895	817
DIRECT	NOTOOL	S2	F	IBB	4.01	568	DIRECT	NOTOOL	S2	F	IG	8.562	564
DIRECT	NOTOOL	S2	F	IBB	4.24	903	DIRECT	NOTOOL	S2	F	IG	8.965	836
DIRECT	NOTOOL	S2	F	IBB	3.89	622	DIRECT	NOTOOL	S2	F	IG	8.225	888
FISHEYE	NOTOOL	S2	F	IBB	7.2	1585	FISHEYE	NOTOOL	S2	F	IG	14.549	1098
FISHEYE	NOTOOL	S2	F	IBB	6.32	766	FISHEYE	NOTOOL	S2	F	IG	14.244	869
FISHEYE	NOTOOL	S2	F	IBB	6.316	1950	FISHEYE	NOTOOL	S2	F	IG	14.719	1131
FISHEYE	NOTOOL	S2	F	IBB	6.604	1552	FISHEYE	NOTOOL	S2	F	IG	12.801	1026
FISHEYE	NOTOOL	S2	F	IBB	6.417	1305	FISHEYE	NOTOOL	S2	F	IG	13.245	964
FISHEYE	NOTOOL	S2	F	IBB	6.456	1264	FISHEYE	NOTOOL	S2	F	IG	13.889	855
FISHEYE	NOTOOL	S2	F	IBB	5.878	1184	FISHEYE	NOTOOL	S2	F	IG	14.686	726
FISHEYE	NOTOOL	S2	F	IBB	5.619	1918	FISHEYE	NOTOOL	S2	F	IG	12.619	923
FISHEYE	NOTOOL	S2	F	IBB	5.893	1498	FISHEYE	NOTOOL	S2	F	IG	14.789	980
FISHEYE	NOTOOL	S2	F	IBB	5.414	1841	FISHEYE	NOTOOL	S2	F	IG	15.192	929
UNDISTORTED	NOTOOL	S2	F	IBB	6.267	2185	UNDISTORTED	NOTOOL	S2	F	IG	17.511	592
UNDISTORTED	NOTOOL	S2	F	IBB	7.195	1844	UNDISTORTED	NOTOOL	S2	F	IG	14.866	960
UNDISTORTED	NOTOOL	S2	F	IBB	5.555	1585	UNDISTORTED	NOTOOL	S2	F	IG	17.47	971
UNDISTORTED	NOTOOL	S2	F	IBB	6.78	1390	UNDISTORTED	NOTOOL	S2	F	IG	13.881	954
UNDISTORTED	NOTOOL	S2	F	IBB	5.694	1321	UNDISTORTED	NOTOOL	S2	F	IG	12.901	1064
UNDISTORTED	NOTOOL	S2	F	IBB	6.023	1578	UNDISTORTED	NOTOOL	S2	F	IG	14.644	1367
UNDISTORTED	NOTOOL	S2	F	IBB	6.045	1694	UNDISTORTED	NOTOOL	S2	F	IG	13.968	1430
UNDISTORTED	NOTOOL	S2	F	IBB	5.576	1873	UNDISTORTED	NOTOOL	S2	F	IG	12.532	1597
UNDISTORTED	NOTOOL	S2	F	IBB	5.996	2004	UNDISTORTED	NOTOOL	S2	F	IG	12.295	927
UNDISTORTED	NOTOOL	S2	F	IBB	6.54	1152	UNDISTORTED	NOTOOL	S2	F	IG	13.864	974
OCULUS	NOTOOL	S2	F	IBB	7.532	2199	OCULUS	NOTOOL	S2	F	IG	14.169	652
OCULUS	NOTOOL	S2	F	IBB	8.028	1797	OCULUS	NOTOOL	S2	F	IG	13.218	398
OCULUS	NOTOOL	S2	F	IBB	7.439	2276	OCULUS	NOTOOL	S2	F	IG	11.241	237
OCULUS	NOTOOL	S2	F	IBB	6.62	2409	OCULUS	NOTOOL	S2	F	IG	14.141	768
OCULUS	NOTOOL	S2	F	IBB	7.6	2606	OCULUS	NOTOOL	S2	F	IG	13.613	648
OCULUS	NOTOOL	S2	F	IBB	9.4	2772	OCULUS	NOTOOL	S2	F	IG	15.664	839
OCULUS	NOTOOL	S2	F	IBB	6.111	2216	OCULUS	NOTOOL	S2	F	IG	13.45	522
OCULUS	NOTOOL	S2	F	IBB	6.876	2148	OCULUS	NOTOOL	S2	F	IG	14.083	750
OCULUS	NOTOOL	S2	F	IBB	5.779	2073	OCULUS	NOTOOL	S2	F	IG	11.702	1077
OCULUS	NOTOOL	S2	F	IBB	5.87	1703	OCULUS	NOTOOL	S2	F	IG	12.816	769
DIRECT	TOOL	S2	F	IBB	3.859	874	DIRECT	TOOL	S2	F	IG	9.295	1134
DIRECT	TOOL	S2	F	IBB	3.738	706	DIRECT	TOOL	S2	F	IG	8.429	741
DIRECT	TOOL	S2	F	IBB	3.981	864	DIRECT	TOOL	S2	F	IG	8.487	684
DIRECT	TOOL	S2	F	IBB	3.979	650	DIRECT	TOOL	S2	F	IG	8.49	468
DIRECT	TOOL	S2	F	IBB	3.879	498	DIRECT	TOOL	S2	F	IG	7.845	563
DIRECT	TOOL	S2	F	IBB	4.016	756	DIRECT	TOOL	S2	F	IG	8.403	580
DIRECT	TOOL	S2	F	IBB	3.789	973	DIRECT	TOOL	S2	F	IG	8.896	406
DIRECT	TOOL	S2	F	IBB	3.62	738	DIRECT	TOOL	S2	F	IG	7.203	434
DIRECT	TOOL	S2	F	IBB	3.792	798	DIRECT	TOOL	S2	F	IG	7.471	335
DIRECT	TOOL	S2	F	IBB	3.625	742	DIRECT	TOOL	S2	F	IG	7.458	338
FISHEYE	TOOL	S2	F	IBB	6.976	2168	FISHEYE	TOOL	S2	F	IG	17.203	687
FISHEYE	TOOL	S2	F	IBB	6.489	2178	FISHEYE	TOOL	S2	F	IG	16.375	1402
FISHEYE	TOOL	S2	F	IBB	6.021	2082	FISHEYE	TOOL	S2	F	IG	16.514	672
FISHEYE	TOOL	S2	F	IBB	6.171	1596	FISHEYE	TOOL	S2	F	IG	19.887	951
FISHEYE	TOOL	S2	F	IBB	6.254	1718	FISHEYE	TOOL	S2	F	IG	17.554	1091
FISHEYE	TOOL	S2	F	IBB	6.092	1187	FISHEYE	TOOL	S2	F	IG	19.53	600
FISHEYE	TOOL	S2	F	IBB	6.091	795	FISHEYE	TOOL	S2	F	IG	18.158	1219
FISHEYE	TOOL	S2	F	IBB	6.029	1629	FISHEYE	TOOL	S2	F	IG	16.554	1021
FISHEYE	TOOL	S2	F	IBB	5.568	1797	FISHEYE	TOOL	S2	F	IG	18.717	726
FISHEYE	TOOL	S2	F	IBB	5.599	1595	FISHEYE	TOOL	S2	F	IG	19.033	928
UNDISTORTED	TOOL	S2	F	IBB	6.43	1643	UNDISTORTED	TOOL	S2	F	IG	19.795	863
UNDISTORTED	TOOL	S2	F	IBB	6.346	1580	UNDISTORTED	TOOL	S2	F	IG	16.375	1346
UNDISTORTED	TOOL	S2	F	IBB	6.262	1559	UNDISTORTED	TOOL	S2	F	IG	16.392	1007
UNDISTORTED	TOOL	S2	F	IBB	5.839	1739	UNDISTORTED	TOOL	S2	F	IG	17.272	1306
UNDISTORTED	TOOL	S2	F	IBB	5.668	1101	UNDISTORTED	TOOL	S2	F	IG	20.594	1340
UNDISTORTED	TOOL	S2	F	IBB	5.8	1265	UNDISTORTED	TOOL	S2	F	IG	18.036	1260
UNDISTORTED	TOOL	S2	F	IBB	5.839	1473	UNDISTORTED	TOOL	S2	F	IG	18.02	1208
UNDISTORTED	TOOL	S2	F	IBB	5.363	1234	UNDISTORTED	TOOL	S2	F	IG	19.531	933
UNDISTORTED	TOOL	S2	F	IBB	5.429	1651	UNDISTORTED	TOOL	S2	F	IG	15.447	1334
UNDISTORTED	TOOL	S2	F	IBB	5.643	2086	UNDISTORTED	TOOL	S2	F	IG	15.532	1453
OCULUS	TOOL	S2	F	IBB	7.193	2133	OCULUS	TOOL	S2	F	IG	21.059	512
OCULUS	TOOL	S2	F	IBB	6.845	3000	OCULUS	TOOL	S2	F	IG	15.787	1100
OCULUS	TOOL	S2	F	IBB	6.713	3162	OCULUS	TOOL	S2	F	IG	16.61	631
OCULUS	TOOL	S2	F	IBB	6.872	2768	OCULUS	TOOL	S2	F	IG	16.508	882
OCULUS	TOOL	S2	F	IBB	6.808	2209	OCULUS	TOOL	S2	F	IG	18.773	723
OCULUS	TOOL	S2	F	IBB	6.314	2520	OCULUS	TOOL	S2	F	IG	17.492	809
OCULUS	TOOL	S2	F	IBB	6.378	2765	OCULUS	TOOL	S2	F	IG	20.715	570
OCULUS	TOOL	S2	F	IBB	5.936	2367	OCULUS	TOOL	S2	F	IG	20.799	635
OCULUS	TOOL	S2	F	IBB	6.015	3364	OCULUS	TOOL	S2	F	IG	18.627	514
OCULUS	TOOL	S2	F	IBB	5.834	2848	OCULUS	TOOL	S2	F	IG	20.748	568
DIRECT	NOTOOL	S1	F	IK	5.209	507	DIRECT	NOTOOL	S1	M	RD	8.725	537
DIRECT	NOTOOL	S1	F	IK	5.607	330	DIRECT	NOTOOL	S1	M	RD	7.912	591
DIRECT	NOTOOL	S1	F	IK	5.502	546	DIRECT	NOTOOL	S1	M	RD	7.161	700
DIRECT	NOTOOL	S1	F	IK	5.015	506	DIRECT	NOTOOL	S1	M	RD	6.549	723
DIRECT	NOTOOL	S1	F	IK	5.755	319	DIRECT	NOTOOL	S1	M	RD	7.435	406
DIRECT	NOTOOL	S1	F	IK	5.653	576	DIRECT	NOTOOL	S1	M	RD	7.687	646
DIRECT	NOTOOL	S1	F	IK	6.785	386	DIRECT	NOTOOL	S1	M	RD	7.406	506
DIRECT	NOTOOL	S1	F	IK	7.044	415	DIRECT	NOTOOL	S1	M	RD	6.78	602
DIRECT	NOTOOL	S1	F	IK	5.62	433	DIRECT	NOTOOL	S1	M	RD	5.83	700
DIRECT	NOTOOL	S1	F	IK	5.612	340	DIRECT	NOTOOL	S1	M	RD	5.864	386
FISHEYE	NOTOOL	S1	F	IK	13.941	95	FISHEYE	NOTOOL	S1	M	RD	19.169	903
FISHEYE	NOTOOL	S1	F	IK	12.083	462	FISHEYE	NOTOOL	S1	M	RD	12.609	809
FISHEYE	NOTOOL	S1	F	IK	10.703	533	FISHEYE	NOTOOL	S1	M	RD	12.422	1563
FISHEYE	NOTOOL	S1	F	IK	10.881	357	FISHEYE	NOTOOL	S1	M	RD	12.822	554
FISHEYE	NOTOOL	S1	F	IK	8.76	456	FISHEYE	NOTOOL	S1	M	RD	13.575	1577
FISHEYE	NOTOOL	S1	F	IK	11.624	864	FISHEYE	NOTOOL	S1	M	RD	11.674	859
FISHEYE	NOTOOL	S1	F	IK	16.367	743	FISHEYE	NOTOOL	S1	M	RD	12.182	1064
FISHEYE	NOTOOL	S1	F	IK	13.295	588	FISHEYE	NOTOOL	S1	M	RD	11.701	992
FISHEYE	NOTOOL	S1	F	IK	11.104	581	FISHEYE	NOTOOL	S1	M	RD	12.686	1091
FISHEYE	NOTOOL	S1	F	IK	11.91	527	FISHEYE	NOTOOL	S1	M	RD	11.532	1306
UNDISTORTED	NOTOOL	S1	F	IK	14.18	330	UNDISTORTED	NOTOOL	S1	M	RD	12.361	1135
UNDISTORTED	NOTOOL	S1	F	IK	11.423	611	UNDISTORTED	NOTOOL	S1	M	RD	10.182	517
UNDISTORTED	NOTOOL	S1	F	IK	13.581	553	UNDISTORTED	NOTOOL	S1	M	RD	10.372	778
UNDISTORTED	NOTOOL	S1	F	IK	9.605	671	UNDISTORTED	NOTOOL	S1	M	RD	10.114	1553
UNDISTORTED	NOTOOL	S1	F	IK	10.851	805	UNDISTORTED	NOTOOL	S1	M	RD	9.713	1451
UNDISTORTED	NOTOOL	S1	F	IK	9.927	780	UNDISTORTED	NOTOOL	S1	M	RD	9.677	960
UNDISTORTED	NOTOOL	S1	F	IK	9.939	411	UNDISTORTED	NOTOOL	S1	M	RD	10.5	1636
UNDISTORTED	NOTOOL	S1	F	IK	14.769	865	UNDISTORTED	NOTOOL	S1	M	RD	8.343	1279
UNDISTORTED	NOTOOL	S1	F	IK	14.476	365	UNDISTORTED	NOTOOL	S1	M	RD	8.154	1381
UNDISTORTED	NOTOOL	S1	F	IK	9.707	430	UNDISTORTED	NOTOOL	S1	M	RD	8.827	1273
OCULUS	NOTOOL	S1	F	IK	11.864	778	OCULUS	NOTOOL	S1	M	RD	13.53	536
OCULUS	NOTOOL	S1	F	IK	10.235	1274	OCULUS	NOTOOL	S1	M	RD	10.992	1124
OCULUS	NOTOOL	S1	F	IK	12.591	614	OCULUS	NOTOOL	S1	M	RD	10.897	1431
OCULUS	NOTOOL	S1	F	IK	8.439	2202	OCULUS	NOTOOL	S1	M	RD	9.39	904
OCULUS	NOTOOL	S1	F	IK	7.616	803	OCULUS	NOTOOL	S1	M	RD	9.372	950
OCULUS	NOTOOL	S1	F	IK	11.273	594	OCULUS	NOTOOL	S1	M	RD	6.96	1098
OCULUS	NOTOOL	S1	F	IK	10.209	990	OCULUS	NOTOOL	S1	M	RD	7.233	1019
OCULUS	NOTOOL	S1	F	IK	9.975	2829	OCULUS	NOTOOL	S1	M	RD	6.503	1834
OCULUS	NOTOOL	S1	F	IK	8.808	1565	OCULUS	NOTOOL	S1	M	RD	10.015	1031
OCULUS	NOTOOL	S1	F	IK	10.992	669	OCULUS	NOTOOL	S1	M	RD	8.954	1102
DIRECT	TOOL	S1	F	IK	8.108	587	DIRECT	TOOL	S1	M	RD	6.849	458
DIRECT	TOOL	S1	F	IK	8.421	592	DIRECT	TOOL	S1	M	RD	6.498	250
DIRECT	TOOL	S1	F	IK	9.284	538	DIRECT	TOOL	S1	M	RD	6.282	557
DIRECT	TOOL	S1	F	IK	7.938	398	DIRECT	TOOL	S1	M	RD	6.366	897
DIRECT	TOOL	S1	F	IK	7.648	414	DIRECT	TOOL	S1	M	RD	6.536	919
DIRECT	TOOL	S1	F	IK	7.363	386	DIRECT	TOOL	S1	M	RD	6.937	482
DIRECT	TOOL	S1	F	IK	7.119	344	DIRECT	TOOL	S1	M	RD	6.468	591
DIRECT	TOOL	S1	F	IK	8.914	765	DIRECT	TOOL	S1	M	RD	6.157	844
DIRECT	TOOL	S1	F	IK	7.647	377	DIRECT	TOOL	S1	M	RD	6.187	402
DIRECT	TOOL	S1	F	IK	7.739	628	DIRECT	TOOL	S1	M	RD	6.286	662
FISHEYE	TOOL	S1	F	IK	14.314	878	FISHEYE	TOOL	S1	M	RD	13.596	634
FISHEYE	TOOL	S1	F	IK	17.069	884	FISHEYE	TOOL	S1	M	RD	15.864	774
FISHEYE	TOOL	S1	F	IK	22.435	776	FISHEYE	TOOL	S1	M	RD	18.41	418
FISHEYE	TOOL	S1	F	IK	13.643	1615	FISHEYE	TOOL	S1	M	RD	14.914	782
FISHEYE	TOOL	S1	F	IK	9.685	1723	FISHEYE	TOOL	S1	M	RD	14.025	777
FISHEYE	TOOL	S1	F	IK	12.479	1039	FISHEYE	TOOL	S1	M	RD	15.107	680
FISHEYE	TOOL	S1	F	IK	13.617	925	FISHEYE	TOOL	S1	M	RD	14.511	696
FISHEYE	TOOL	S1	F	IK	12.365	678	FISHEYE	TOOL	S1	M	RD	14.324	609
FISHEYE	TOOL	S1	F	IK	16.007	581	FISHEYE	TOOL	S1	M	RD	14.006	1275
FISHEYE	TOOL	S1	F	IK	11.816	625	FISHEYE	TOOL	S1	M	RD	12.836	802
UNDISTORTED	TOOL	S1	F	IK	11.207	718	UNDISTORTED	TOOL	S1	M	RD	10.081	1445
UNDISTORTED	TOOL	S1	F	IK	10.669	929	UNDISTORTED	TOOL	S1	M	RD	10.863	1312
UNDISTORTED	TOOL	S1	F	IK	13.935	546	UNDISTORTED	TOOL	S1	M	RD	12.059	1310
UNDISTORTED	TOOL	S1	F	IK	13.343	950	UNDISTORTED	TOOL	S1	M	RD	10.99	892
UNDISTORTED	TOOL	S1	F	IK	12.069	1020	UNDISTORTED	TOOL	S1	M	RD	13.637	1390
UNDISTORTED	TOOL	S1	F	IK	13.691	625	UNDISTORTED	TOOL	S1	M	RD	10.82	996
UNDISTORTED	TOOL	S1	F	IK	12.721	628	UNDISTORTED	TOOL	S1	M	RD	12.375	1171
UNDISTORTED	TOOL	S1	F	IK	18.292	92	UNDISTORTED	TOOL	S1	M	RD	10.269	1156
UNDISTORTED	TOOL	S1	F	IK	13.278	900	UNDISTORTED	TOOL	S1	M	RD	10.045	1491
UNDISTORTED	TOOL	S1	F	IK	13.203	351	UNDISTORTED	TOOL	S1	M	RD	10.962	644
OCULUS	TOOL	S1	F	IK	13.404	1227	OCULUS	TOOL	S1	M	RD	10.999	1688
OCULUS	TOOL	S1	F	IK	11.129	1858	OCULUS	TOOL	S1	M	RD	9.459	1889
OCULUS	TOOL	S1	F	IK	9.426	1682	OCULUS	TOOL	S1	M	RD	9.223	2192
OCULUS	TOOL	S1	F	IK	11.937	1443	OCULUS	TOOL	S1	M	RD	9.289	2019
OCULUS	TOOL	S1	F	IK	11.555	1550	OCULUS	TOOL	S1	M	RD	10.409	1473
OCULUS	TOOL	S1	F	IK	11.302	670	OCULUS	TOOL	S1	M	RD	16.247	1388
OCULUS	TOOL	S1	F	IK	12.553	1567	OCULUS	TOOL	S1	M	RD	10.029	1668
OCULUS	TOOL	S1	F	IK	10.405	1004	OCULUS	TOOL	S1	M	RD	12.052	1339
OCULUS	TOOL	S1	F	IK	10.633	434	OCULUS	TOOL	S1	M	RD	9.12	1546
OCULUS	TOOL	S1	F	IK	9.689	893	OCULUS	TOOL	S1	M	RD	11.691	1187
DIRECT	NOTOOL	S2	F	IK	6.681	464	DIRECT	NOTOOL	S2	M	RD	4.824	790
DIRECT	NOTOOL	S2	F	IK	5.522	889	DIRECT	NOTOOL	S2	M	RD	4.526	592
DIRECT	NOTOOL	S2	F	IK	5.259	607	DIRECT	NOTOOL	S2	M	RD	4.463	815
DIRECT	NOTOOL	S2	F	IK	4.486	1160	DIRECT	NOTOOL	S2	M	RD	4.294	445
DIRECT	NOTOOL	S2	F	IK	5.368	1365	DIRECT	NOTOOL	S2	M	RD	3.866	477
DIRECT	NOTOOL	S2	F	IK	5.373	1172	DIRECT	NOTOOL	S2	M	RD	4.51	921
DIRECT	NOTOOL	S2	F	IK	5.399	486	DIRECT	NOTOOL	S2	M	RD	4.547	1106
DIRECT	NOTOOL	S2	F	IK	4.944	489	DIRECT	NOTOOL	S2	M	RD	4.625	879
DIRECT	NOTOOL	S2	F	IK	4.948	952	DIRECT	NOTOOL	S2	M	RD	4.255	860
DIRECT	NOTOOL	S2	F	IK	4.532	1076	DIRECT	NOTOOL	S2	M	RD	4.257	509
FISHEYE	NOTOOL	S2	F	IK	9.207	570	FISHEYE	NOTOOL	S2	M	RD	8.814	1208
FISHEYE	NOTOOL	S2	F	IK	8.79	879	FISHEYE	NOTOOL	S2	M	RD	7.897	1891
FISHEYE	NOTOOL	S2	F	IK	7.751	580	FISHEYE	NOTOOL	S2	M	RD	7.608	1333
FISHEYE	NOTOOL	S2	F	IK	7.493	504	FISHEYE	NOTOOL	S2	M	RD	6.853	1178
FISHEYE	NOTOOL	S2	F	IK	8.536	901	FISHEYE	NOTOOL	S2	M	RD	7.11	1247
FISHEYE	NOTOOL	S2	F	IK	8.238	567	FISHEYE	NOTOOL	S2	M	RD	6.465	1613
FISHEYE	NOTOOL	S2	F	IK	8.811	730	FISHEYE	NOTOOL	S2	M	RD	6.374	1184
FISHEYE	NOTOOL	S2	F	IK	7.538	1019	FISHEYE	NOTOOL	S2	M	RD	6.18	2178
FISHEYE	NOTOOL	S2	F	IK	9.52	1197	FISHEYE	NOTOOL	S2	M	RD	6.63	1739
FISHEYE	NOTOOL	S2	F	IK	9.668	1006	FISHEYE	NOTOOL	S2	M	RD	6.734	1327
UNDISTORTED	NOTOOL	S2	F	IK	9.803	935	UNDISTORTED	NOTOOL	S2	M	RD	10.063	1766
UNDISTORTED	NOTOOL	S2	F	IK	7.902	1077	UNDISTORTED	NOTOOL	S2	M	RD	8.983	1498
UNDISTORTED	NOTOOL	S2	F	IK	9.252	1091	UNDISTORTED	NOTOOL	S2	M	RD	7.979	1150
UNDISTORTED	NOTOOL	S2	F	IK	9.584	635	UNDISTORTED	NOTOOL	S2	M	RD	8.046	1100
UNDISTORTED	NOTOOL	S2	F	IK	9.213	376	UNDISTORTED	NOTOOL	S2	M	RD	8.676	949
UNDISTORTED	NOTOOL	S2	F	IK	10.282	761	UNDISTORTED	NOTOOL	S2	M	RD	8.635	1162
UNDISTORTED	NOTOOL	S2	F	IK	9.742	659	UNDISTORTED	NOTOOL	S2	M	RD	7.789	1349
UNDISTORTED	NOTOOL	S2	F	IK	9.176	744	UNDISTORTED	NOTOOL	S2	M	RD	8.222	1697
UNDISTORTED	NOTOOL	S2	F	IK	9.106	737	UNDISTORTED	NOTOOL	S2	M	RD	7.998	1206
UNDISTORTED	NOTOOL	S2	F	IK	9.208	641	UNDISTORTED	NOTOOL	S2	M	RD	7.854	1877
OCULUS	NOTOOL	S2	F	IK	9.436	813	OCULUS	NOTOOL	S2	M	RD	8.225	2319
OCULUS	NOTOOL	S2	F	IK	8.841	1400	OCULUS	NOTOOL	S2	M	RD	7.098	2598
OCULUS	NOTOOL	S2	F	IK	8.479	910	OCULUS	NOTOOL	S2	M	RD	9.071	1197
OCULUS	NOTOOL	S2	F	IK	7.929	1078	OCULUS	NOTOOL	S2	M	RD	8.727	1381
OCULUS	NOTOOL	S2	F	IK	7.917	1398	OCULUS	NOTOOL	S2	M	RD	7.973	1283
OCULUS	NOTOOL	S2	F	IK	10.321	1069	OCULUS	NOTOOL	S2	M	RD	8.346	1602
OCULUS	NOTOOL	S2	F	IK	9.317	1128	OCULUS	NOTOOL	S2	M	RD	7.245	1959
OCULUS	NOTOOL	S2	F	IK	9.223	1048	OCULUS	NOTOOL	S2	M	RD	8.691	1062
OCULUS	NOTOOL	S2	F	IK	9.696	1268	OCULUS	NOTOOL	S2	M	RD	8.423	1169
OCULUS	NOTOOL	S2	F	IK	10.68	818	OCULUS	NOTOOL	S2	M	RD	8.412	1660
DIRECT	TOOL	S2	F	IK	7.097	603	DIRECT	TOOL	S2	M	RD	4.331	691
DIRECT	TOOL	S2	F	IK	7.531	1073	DIRECT	TOOL	S2	M	RD	4.79	632
DIRECT	TOOL	S2	F	IK	7.571	913	DIRECT	TOOL	S2	M	RD	5.158	719
DIRECT	TOOL	S2	F	IK	6.576	687	DIRECT	TOOL	S2	M	RD	5.043	762
DIRECT	TOOL	S2	F	IK	6.719	1248	DIRECT	TOOL	S2	M	RD	4.713	685
DIRECT	TOOL	S2	F	IK	6.948	965	DIRECT	TOOL	S2	M	RD	4.915	451
DIRECT	TOOL	S2	F	IK	5.558	1283	DIRECT	TOOL	S2	M	RD	4.484	912
DIRECT	TOOL	S2	F	IK	5.848	1051	DIRECT	TOOL	S2	M	RD	4.749	652
DIRECT	TOOL	S2	F	IK	6.462	1292	DIRECT	TOOL	S2	M	RD	4.805	700
DIRECT	TOOL	S2	F	IK	6.127	1299	DIRECT	TOOL	S2	M	RD	4.983	1463
FISHEYE	TOOL	S2	F	IK	9.895	619	FISHEYE	TOOL	S2	M	RD	8.718	571
FISHEYE	TOOL	S2	F	IK	8.479	1037	FISHEYE	TOOL	S2	M	RD	8.728	1528
FISHEYE	TOOL	S2	F	IK	9.567	826	FISHEYE	TOOL	S2	M	RD	8.473	1249
FISHEYE	TOOL	S2	F	IK	9.377	657	FISHEYE	TOOL	S2	M	RD	8.688	1188
FISHEYE	TOOL	S2	F	IK	9.932	953	FISHEYE	TOOL	S2	M	RD	8.415	1205
FISHEYE	TOOL	S2	F	IK	10.692	496	FISHEYE	TOOL	S2	M	RD	11.776	1740
FISHEYE	TOOL	S2	F	IK	10.74	445	FISHEYE	TOOL	S2	M	RD	9.743	1244
FISHEYE	TOOL	S2	F	IK	7.965	482	FISHEYE	TOOL	S2	M	RD	10.547	2462
FISHEYE	TOOL	S2	F	IK	8.967	1275	FISHEYE	TOOL	S2	M	RD	9.418	1168
FISHEYE	TOOL	S2	F	IK	10.088	1156	FISHEYE	TOOL	S2	M	RD	7.787	1256
UNDISTORTED	TOOL	S2	F	IK	8.571	568	UNDISTORTED	TOOL	S2	M	RD	13.13	1468
UNDISTORTED	TOOL	S2	F	IK	8.966	799	UNDISTORTED	TOOL	S2	M	RD	13.036	1080
UNDISTORTED	TOOL	S2	F	IK	9.372	949	UNDISTORTED	TOOL	S2	M	RD	11.511	1301
UNDISTORTED	TOOL	S2	F	IK	11.706	829	UNDISTORTED	TOOL	S2	M	RD	10.531	1844
UNDISTORTED	TOOL	S2	F	IK	10.341	1274	UNDISTORTED	TOOL	S2	M	RD	10.477	896
UNDISTORTED	TOOL	S2	F	IK	7.932	1940	UNDISTORTED	TOOL	S2	M	RD	13.773	1655
UNDISTORTED	TOOL	S2	F	IK	11.454	952	UNDISTORTED	TOOL	S2	M	RD	11.473	1025
UNDISTORTED	TOOL	S2	F	IK	8.921	1103	UNDISTORTED	TOOL	S2	M	RD	9.989	2054
UNDISTORTED	TOOL	S2	F	IK	9.563	1849	UNDISTORTED	TOOL	S2	M	RD	10.495	816
UNDISTORTED	TOOL	S2	F	IK	10.169	1097	UNDISTORTED	TOOL	S2	M	RD	10.136	1100
OCULUS	TOOL	S2	F	IK	13.828	1668	OCULUS	TOOL	S2	M	RD	9.424	1627
OCULUS	TOOL	S2	F	IK	10.84	1357	OCULUS	TOOL	S2	M	RD	10.478	1435
OCULUS	TOOL	S2	F	IK	10.609	1212	OCULUS	TOOL	S2	M	RD	7.989	1627
OCULUS	TOOL	S2	F	IK	10.086	1540	OCULUS	TOOL	S2	M	RD	9.852	1760
OCULUS	TOOL	S2	F	IK	10.145	1724	OCULUS	TOOL	S2	M	RD	9.071	1892
OCULUS	TOOL	S2	F	IK	13.218	1625	OCULUS	TOOL	S2	M	RD	8.821	1887
OCULUS	TOOL	S2	F	IK	8.155	1121	OCULUS	TOOL	S2	M	RD	9.126	1795
OCULUS	TOOL	S2	F	IK	8.46	2478	OCULUS	TOOL	S2	M	RD	10.303	1903
OCULUS	TOOL	S2	F	IK	7.064	2478	OCULUS	TOOL	S2	M	RD	9.023	1490
OCULUS	TOOL	S2	F	IK	11.071	1441	OCULUS	TOOL	S2	M	RD	10.962	1461
DIRECT	NOTOOL	S1	F	MU	6.93	335	DIRECT	NOTOOL	S1	F	AR	3.768	959
DIRECT	NOTOOL	S1	F	MU	6.809	645	DIRECT	NOTOOL	S1	F	AR	4.272	972
DIRECT	NOTOOL	S1	F	MU	7.391	442	DIRECT	NOTOOL	S1	F	AR	5.863	655
DIRECT	NOTOOL	S1	F	MU	8.117	790	DIRECT	NOTOOL	S1	F	AR	4.862	1248
DIRECT	NOTOOL	S1	F	MU	7.975	974	DIRECT	NOTOOL	S1	F	AR	6.592	1150
DIRECT	NOTOOL	S1	F	MU	6.59	343	DIRECT	NOTOOL	S1	F	AR	5.096	880
DIRECT	NOTOOL	S1	F	MU	7.193	660	DIRECT	NOTOOL	S1	F	AR	8.048	680
DIRECT	NOTOOL	S1	F	MU	7.145	643	DIRECT	NOTOOL	S1	F	AR	5.891	1095
DIRECT	NOTOOL	S1	F	MU	7.625	778	DIRECT	NOTOOL	S1	F	AR	6.707	402
DIRECT	NOTOOL	S1	F	MU	7.453	551	DIRECT	NOTOOL	S1	F	AR	4.766	459
FISHEYE	NOTOOL	S1	F	MU	12.018	697	FISHEYE	NOTOOL	S1	F	AR	20.557	718
FISHEYE	NOTOOL	S1	F	MU	10.409	781	FISHEYE	NOTOOL	S1	F	AR	14.702	1030
FISHEYE	NOTOOL	S1	F	MU	10.128	702	FISHEYE	NOTOOL	S1	F	AR	16.217	748
FISHEYE	NOTOOL	S1	F	MU	10.171	316	FISHEYE	NOTOOL	S1	F	AR	13.107	1247
FISHEYE	NOTOOL	S1	F	MU	9.759	487	FISHEYE	NOTOOL	S1	F	AR	10.377	937
FISHEYE	NOTOOL	S1	F	MU	9.422	388	FISHEYE	NOTOOL	S1	F	AR	14.344	1227
FISHEYE	NOTOOL	S1	F	MU	11.132	667	FISHEYE	NOTOOL	S1	F	AR	13.48	1435
FISHEYE	NOTOOL	S1	F	MU	10.329	640	FISHEYE	NOTOOL	S1	F	AR	17.703	1607
FISHEYE	NOTOOL	S1	F	MU	9.958	897	FISHEYE	NOTOOL	S1	F	AR	11.581	1751
FISHEYE	NOTOOL	S1	F	MU	9.845	574	FISHEYE	NOTOOL	S1	F	AR	11.178	1920
UNDISTORTED	NOTOOL	S1	F	MU	10.751	505	UNDISTORTED	NOTOOL	S1	F	AR	12.318	1188
UNDISTORTED	NOTOOL	S1	F	MU	12.693	470	UNDISTORTED	NOTOOL	S1	F	AR	12.701	1452
UNDISTORTED	NOTOOL	S1	F	MU	10.501	658	UNDISTORTED	NOTOOL	S1	F	AR	8.518	1567
UNDISTORTED	NOTOOL	S1	F	MU	10.431	1042	UNDISTORTED	NOTOOL	S1	F	AR	9.444	1092
UNDISTORTED	NOTOOL	S1	F	MU	10.201	1069	UNDISTORTED	NOTOOL	S1	F	AR	9.481	1621
UNDISTORTED	NOTOOL	S1	F	MU	12.653	975	UNDISTORTED	NOTOOL	S1	F	AR	10.335	1836
UNDISTORTED	NOTOOL	S1	F	MU	10.654	291	UNDISTORTED	NOTOOL	S1	F	AR	11.139	1371
UNDISTORTED	NOTOOL	S1	F	MU	11.093	557	UNDISTORTED	NOTOOL	S1	F	AR	12.338	1274
UNDISTORTED	NOTOOL	S1	F	MU	9.463	1010	UNDISTORTED	NOTOOL	S1	F	AR	10.217	1776
UNDISTORTED	NOTOOL	S1	F	MU	10.541	792	UNDISTORTED	NOTOOL	S1	F	AR	12.444	1598
OCULUS	NOTOOL	S1	F	MU	11.952	745	OCULUS	NOTOOL	S1	F	AR	12.865	962
OCULUS	NOTOOL	S1	F	MU	14.863	1174	OCULUS	NOTOOL	S1	F	AR	12.117	1511
OCULUS	NOTOOL	S1	F	MU	12.193	1032	OCULUS	NOTOOL	S1	F	AR	11.438	369
OCULUS	NOTOOL	S1	F	MU	12.428	897	OCULUS	NOTOOL	S1	F	AR	9.308	419
OCULUS	NOTOOL	S1	F	MU	12.243	1209	OCULUS	NOTOOL	S1	F	AR	9.836	1447
OCULUS	NOTOOL	S1	F	MU	11.486	1239	OCULUS	NOTOOL	S1	F	AR	9.486	1373
OCULUS	NOTOOL	S1	F	MU	12.005	1189	OCULUS	NOTOOL	S1	F	AR	9.5	1167
OCULUS	NOTOOL	S1	F	MU	11.669	818	OCULUS	NOTOOL	S1	F	AR	10.481	839
OCULUS	NOTOOL	S1	F	MU	10.695	730	OCULUS	NOTOOL	S1	F	AR	9.127	1456
OCULUS	NOTOOL	S1	F	MU	11.492	1305	OCULUS	NOTOOL	S1	F	AR	11.312	1539
DIRECT	TOOL	S1	F	MU	6.923	585	DIRECT	TOOL	S1	F	AR	7.899	330
DIRECT	TOOL	S1	F	MU	7.476	301	DIRECT	TOOL	S1	F	AR	7.433	641
DIRECT	TOOL	S1	F	MU	7.767	491	DIRECT	TOOL	S1	F	AR	6.928	351
DIRECT	TOOL	S1	F	MU	7.258	996	DIRECT	TOOL	S1	F	AR	7.253	275
DIRECT	TOOL	S1	F	MU	7.476	471	DIRECT	TOOL	S1	F	AR	8.133	190
DIRECT	TOOL	S1	F	MU	6.902	419	DIRECT	TOOL	S1	F	AR	7.127	365
DIRECT	TOOL	S1	F	MU	6.995	829	DIRECT	TOOL	S1	F	AR	6.848	330
DIRECT	TOOL	S1	F	MU	7.004	799	DIRECT	TOOL	S1	F	AR	6.109	337
DIRECT	TOOL	S1	F	MU	6.682	757	DIRECT	TOOL	S1	F	AR	5.564	357
DIRECT	TOOL	S1	F	MU	6.774	590	DIRECT	TOOL	S1	F	AR	6.966	209
FISHEYE	TOOL	S1	F	MU	9.957	1076	FISHEYE	TOOL	S1	F	AR	18.953	733
FISHEYE	TOOL	S1	F	MU	12.567	826	FISHEYE	TOOL	S1	F	AR	15.391	900
FISHEYE	TOOL	S1	F	MU	11.274	579	FISHEYE	TOOL	S1	F	AR	18.142	799
FISHEYE	TOOL	S1	F	MU	12.139	761	FISHEYE	TOOL	S1	F	AR	14.951	829
FISHEYE	TOOL	S1	F	MU	14.259	470	FISHEYE	TOOL	S1	F	AR	13.3	1121
FISHEYE	TOOL	S1	F	MU	11.341	441	FISHEYE	TOOL	S1	F	AR	12.42	878
FISHEYE	TOOL	S1	F	MU	13.005	733	FISHEYE	TOOL	S1	F	AR	13.358	891
FISHEYE	TOOL	S1	F	MU	11.996	580	FISHEYE	TOOL	S1	F	AR	20.865	1107
FISHEYE	TOOL	S1	F	MU	11.528	537	FISHEYE	TOOL	S1	F	AR	13.142	1684
FISHEYE	TOOL	S1	F	MU	11.284	519	FISHEYE	TOOL	S1	F	AR	13.222	1625
UNDISTORTED	TOOL	S1	F	MU	11.629	732	UNDISTORTED	TOOL	S1	F	AR	14.706	848
UNDISTORTED	TOOL	S1	F	MU	12.793	866	UNDISTORTED	TOOL	S1	F	AR	14.413	840
UNDISTORTED	TOOL	S1	F	MU	11.742	1075	UNDISTORTED	TOOL	S1	F	AR	21.534	1425
UNDISTORTED	TOOL	S1	F	MU	11.52	1024	UNDISTORTED	TOOL	S1	F	AR	16.296	1348
UNDISTORTED	TOOL	S1	F	MU	11.989	1306	UNDISTORTED	TOOL	S1	F	AR	19.018	1049
UNDISTORTED	TOOL	S1	F	MU	12.245	1010	UNDISTORTED	TOOL	S1	F	AR	16.475	1676
UNDISTORTED	TOOL	S1	F	MU	12.951	882	UNDISTORTED	TOOL	S1	F	AR	17.663	1119
UNDISTORTED	TOOL	S1	F	MU	12.925	760	UNDISTORTED	TOOL	S1	F	AR	13.639	933
UNDISTORTED	TOOL	S1	F	MU	12.304	775	UNDISTORTED	TOOL	S1	F	AR	19.397	1020
UNDISTORTED	TOOL	S1	F	MU	12.73	739	UNDISTORTED	TOOL	S1	F	AR	17.219	831
OCULUS	TOOL	S1	F	MU	15.015	985	OCULUS	TOOL	S1	F	AR	18.327	648
OCULUS	TOOL	S1	F	MU	15.217	761	OCULUS	TOOL	S1	F	AR	14.439	388
OCULUS	TOOL	S1	F	MU	16.221	1116	OCULUS	TOOL	S1	F	AR	15.493	480
OCULUS	TOOL	S1	F	MU	13.839	1298	OCULUS	TOOL	S1	F	AR	14.371	353
OCULUS	TOOL	S1	F	MU	10.802	1256	OCULUS	TOOL	S1	F	AR	13.576	580
OCULUS	TOOL	S1	F	MU	13.802	929	OCULUS	TOOL	S1	F	AR	13.421	1014
OCULUS	TOOL	S1	F	MU	14.824	1253	OCULUS	TOOL	S1	F	AR	16.564	328
OCULUS	TOOL	S1	F	MU	12.669	1075	OCULUS	TOOL	S1	F	AR	14.988	471
OCULUS	TOOL	S1	F	MU	13.521	1012	OCULUS	TOOL	S1	F	AR	15.589	669
OCULUS	TOOL	S1	F	MU	13.793	1201	OCULUS	TOOL	S1	F	AR	16.333	383
DIRECT	NOTOOL	S2	F	MU	5.499	744	DIRECT	NOTOOL	S2	F	AR	5.885	367
DIRECT	NOTOOL	S2	F	MU	6.73	842	DIRECT	NOTOOL	S2	F	AR	5.693	378
DIRECT	NOTOOL	S2	F	MU	6.44	350	DIRECT	NOTOOL	S2	F	AR	4.079	579
DIRECT	NOTOOL	S2	F	MU	6.286	313	DIRECT	NOTOOL	S2	F	AR	5.925	427
DIRECT	NOTOOL	S2	F	MU	6.026	344	DIRECT	NOTOOL	S2	F	AR	5.749	357
DIRECT	NOTOOL	S2	F	MU	6.083	791	DIRECT	NOTOOL	S2	F	AR	4.911	680
DIRECT	NOTOOL	S2	F	MU	5.812	1030	DIRECT	NOTOOL	S2	F	AR	4.953	859
DIRECT	NOTOOL	S2	F	MU	6.171	544	DIRECT	NOTOOL	S2	F	AR	5.525	1233
DIRECT	NOTOOL	S2	F	MU	6.048	424	DIRECT	NOTOOL	S2	F	AR	5.39	924
DIRECT	NOTOOL	S2	F	MU	6.003	830	DIRECT	NOTOOL	S2	F	AR	4.893	1064
FISHEYE	NOTOOL	S2	F	MU	10.655	556	FISHEYE	NOTOOL	S2	F	AR	11.489	2402
FISHEYE	NOTOOL	S2	F	MU	9.957	544	FISHEYE	NOTOOL	S2	F	AR	14.597	455
FISHEYE	NOTOOL	S2	F	MU	9.238	420	FISHEYE	NOTOOL	S2	F	AR	12.573	518
FISHEYE	NOTOOL	S2	F	MU	9.588	719	FISHEYE	NOTOOL	S2	F	AR	10.167	553
FISHEYE	NOTOOL	S2	F	MU	10.805	547	FISHEYE	NOTOOL	S2	F	AR	10.475	359
FISHEYE	NOTOOL	S2	F	MU	9.496	392	FISHEYE	NOTOOL	S2	F	AR	11.02	578
FISHEYE	NOTOOL	S2	F	MU	9.387	823	FISHEYE	NOTOOL	S2	F	AR	10.488	751
FISHEYE	NOTOOL	S2	F	MU	9.194	373	FISHEYE	NOTOOL	S2	F	AR	10.216	607
FISHEYE	NOTOOL	S2	F	MU	10.148	747	FISHEYE	NOTOOL	S2	F	AR	10.379	868
FISHEYE	NOTOOL	S2	F	MU	9.092	591	FISHEYE	NOTOOL	S2	F	AR	10.12	844
UNDISTORTED	NOTOOL	S2	F	MU	8.595	863	UNDISTORTED	NOTOOL	S2	F	AR	9.868	484
UNDISTORTED	NOTOOL	S2	F	MU	10.628	1058	UNDISTORTED	NOTOOL	S2	F	AR	10.738	483
UNDISTORTED	NOTOOL	S2	F	MU	10.431	609	UNDISTORTED	NOTOOL	S2	F	AR	9.027	793
UNDISTORTED	NOTOOL	S2	F	MU	10.699	815	UNDISTORTED	NOTOOL	S2	F	AR	8.543	459
UNDISTORTED	NOTOOL	S2	F	MU	9.262	1200	UNDISTORTED	NOTOOL	S2	F	AR	9.422	922
UNDISTORTED	NOTOOL	S2	F	MU	9.417	942	UNDISTORTED	NOTOOL	S2	F	AR	10.689	688
UNDISTORTED	NOTOOL	S2	F	MU	9.319	902	UNDISTORTED	NOTOOL	S2	F	AR	12.344	592
UNDISTORTED	NOTOOL	S2	F	MU	9.19	655	UNDISTORTED	NOTOOL	S2	F	AR	9.409	1266
UNDISTORTED	NOTOOL	S2	F	MU	8.856	895	UNDISTORTED	NOTOOL	S2	F	AR	9.494	745
UNDISTORTED	NOTOOL	S2	F	MU	9.367	1010	UNDISTORTED	NOTOOL	S2	F	AR	9.205	863
OCULUS	NOTOOL	S2	F	MU	10.602	1222	OCULUS	NOTOOL	S2	F	AR	12.689	510
OCULUS	NOTOOL	S2	F	MU	10.037	1105	OCULUS	NOTOOL	S2	F	AR	10.407	656
OCULUS	NOTOOL	S2	F	MU	9.471	1375	OCULUS	NOTOOL	S2	F	AR	9.283	502
OCULUS	NOTOOL	S2	F	MU	8.793	2183	OCULUS	NOTOOL	S2	F	AR	10.617	545
OCULUS	NOTOOL	S2	F	MU	9.003	2108	OCULUS	NOTOOL	S2	F	AR	9.442	584
OCULUS	NOTOOL	S2	F	MU	8.861	1068	OCULUS	NOTOOL	S2	F	AR	9.226	656
OCULUS	NOTOOL	S2	F	MU	9.422	953	OCULUS	NOTOOL	S2	F	AR	9.163	644
OCULUS	NOTOOL	S2	F	MU	10.275	1670	OCULUS	NOTOOL	S2	F	AR	11.269	586
OCULUS	NOTOOL	S2	F	MU	9.609	1816	OCULUS	NOTOOL	S2	F	AR	10.267	517
OCULUS	NOTOOL	S2	F	MU	9.126	1363	OCULUS	NOTOOL	S2	F	AR	9.461	815
DIRECT	TOOL	S2	F	MU	6.495	575	DIRECT	TOOL	S2	F	AR	6.969	226
DIRECT	TOOL	S2	F	MU	6.753	500	DIRECT	TOOL	S2	F	AR	7.148	570
DIRECT	TOOL	S2	F	MU	6.24	530	DIRECT	TOOL	S2	F	AR	6.74	916
DIRECT	TOOL	S2	F	MU	6.174	315	DIRECT	TOOL	S2	F	AR	6.578	379
DIRECT	TOOL	S2	F	MU	6.361	409	DIRECT	TOOL	S2	F	AR	6.844	345
DIRECT	TOOL	S2	F	MU	6.79	380	DIRECT	TOOL	S2	F	AR	6.329	328
DIRECT	TOOL	S2	F	MU	6.579	446	DIRECT	TOOL	S2	F	AR	6.605	585
DIRECT	TOOL	S2	F	MU	5.71	484	DIRECT	TOOL	S2	F	AR	6.864	322
DIRECT	TOOL	S2	F	MU	5.895	626	DIRECT	TOOL	S2	F	AR	6.663	439
DIRECT	TOOL	S2	F	MU	5.981	523	DIRECT	TOOL	S2	F	AR	6.389	787
FISHEYE	TOOL	S2	F	MU	8.828	802	FISHEYE	TOOL	S2	F	AR	11.122	266
FISHEYE	TOOL	S2	F	MU	10.765	768	FISHEYE	TOOL	S2	F	AR	12.419	1004
FISHEYE	TOOL	S2	F	MU	10.468	1330	FISHEYE	TOOL	S2	F	AR	10.761	875
FISHEYE	TOOL	S2	F	MU	9.532	1280	FISHEYE	TOOL	S2	F	AR	11.596	772
FISHEYE	TOOL	S2	F	MU	9.758	866	FISHEYE	TOOL	S2	F	AR	11.644	821
FISHEYE	TOOL	S2	F	MU	10.99	762	FISHEYE	TOOL	S2	F	AR	16.821	622
FISHEYE	TOOL	S2	F	MU	11.038	871	FISHEYE	TOOL	S2	F	AR	11.046	682
FISHEYE	TOOL	S2	F	MU	10.053	1050	FISHEYE	TOOL	S2	F	AR	12.549	755
FISHEYE	TOOL	S2	F	MU	10.313	680	FISHEYE	TOOL	S2	F	AR	16.472	525
FISHEYE	TOOL	S2	F	MU	10.756	516	FISHEYE	TOOL	S2	F	AR	12.355	543
UNDISTORTED	TOOL	S2	F	MU	10.714	1189	UNDISTORTED	TOOL	S2	F	AR	13.753	771
UNDISTORTED	TOOL	S2	F	MU	10.143	855	UNDISTORTED	TOOL	S2	F	AR	11.605	1055
UNDISTORTED	TOOL	S2	F	MU	9.642	935	UNDISTORTED	TOOL	S2	F	AR	12.994	500
UNDISTORTED	TOOL	S2	F	MU	11.372	856	UNDISTORTED	TOOL	S2	F	AR	14.803	846
UNDISTORTED	TOOL	S2	F	MU	10.066	936	UNDISTORTED	TOOL	S2	F	AR	11.485	1111
UNDISTORTED	TOOL	S2	F	MU	10.149	1011	UNDISTORTED	TOOL	S2	F	AR	10.28	1525
UNDISTORTED	TOOL	S2	F	MU	9.129	1333	UNDISTORTED	TOOL	S2	F	AR	12.141	992
UNDISTORTED	TOOL	S2	F	MU	9.624	558	UNDISTORTED	TOOL	S2	F	AR	11.495	854
UNDISTORTED	TOOL	S2	F	MU	12.284	1201	UNDISTORTED	TOOL	S2	F	AR	14.221	875
UNDISTORTED	TOOL	S2	F	MU	10.12	931	UNDISTORTED	TOOL	S2	F	AR	12.186	1297
OCULUS	TOOL	S2	F	MU	10.246	1756	OCULUS	TOOL	S2	F	AR	13.737	645
OCULUS	TOOL	S2	F	MU	11.484	1983	OCULUS	TOOL	S2	F	AR	13.168	773
OCULUS	TOOL	S2	F	MU	13.256	1809	OCULUS	TOOL	S2	F	AR	15.992	603
OCULUS	TOOL	S2	F	MU	14.932	1849	OCULUS	TOOL	S2	F	AR	12.525	494
OCULUS	TOOL	S2	F	MU	12.387	2066	OCULUS	TOOL	S2	F	AR	11.221	639
OCULUS	TOOL	S2	F	MU	13.311	1368	OCULUS	TOOL	S2	F	AR	14.343	989
OCULUS	TOOL	S2	F	MU	10.449	1971	OCULUS	TOOL	S2	F	AR	12.47	803
OCULUS	TOOL	S2	F	MU	11.565	1152	OCULUS	TOOL	S2	F	AR	13.586	392
OCULUS	TOOL	S2	F	MU	10.934	1415	OCULUS	TOOL	S2	F	AR	17.075	577
OCULUS	TOOL	S2	F	MU	13.404	1289	OCULUS	TOOL	S2	F	AR	16.111	487
